# Supplementary material for: A new example of a steroid–amino acid hybrid: construction of constrained nine memberedd-ring steroids
Source: Royal Society of Chemistry journal article supplement (doi:10.1039/b616155c), 2006-12-15
Supplement: b616155c.pdf [file b616155c.pdf]

# **A New example of Steroid-Amino Acid Hybrid: Construction of constrained nine membered D-ring steroids**

*Shagufta and Gautam Panda\**

Medicinal and Process Chemistry Division, Central Drug Research Institute, Lucknow-  
226001, UP, India

[gautam.panda@gmail.com](mailto:gautam.panda@gmail.com)

\* Author to whom correspondence should be addressed

## **Supporting Information**

Contents:

1.  $^1\text{H}$  and  $^{13}\text{C}$  NMR Spectra of Compounds **3-17**: Page no. 2-31
2.  $^1\text{H}$ - $^1\text{H}$  COSY, HSQC, HMBC Spectra of **3b**: Page no. 32-34

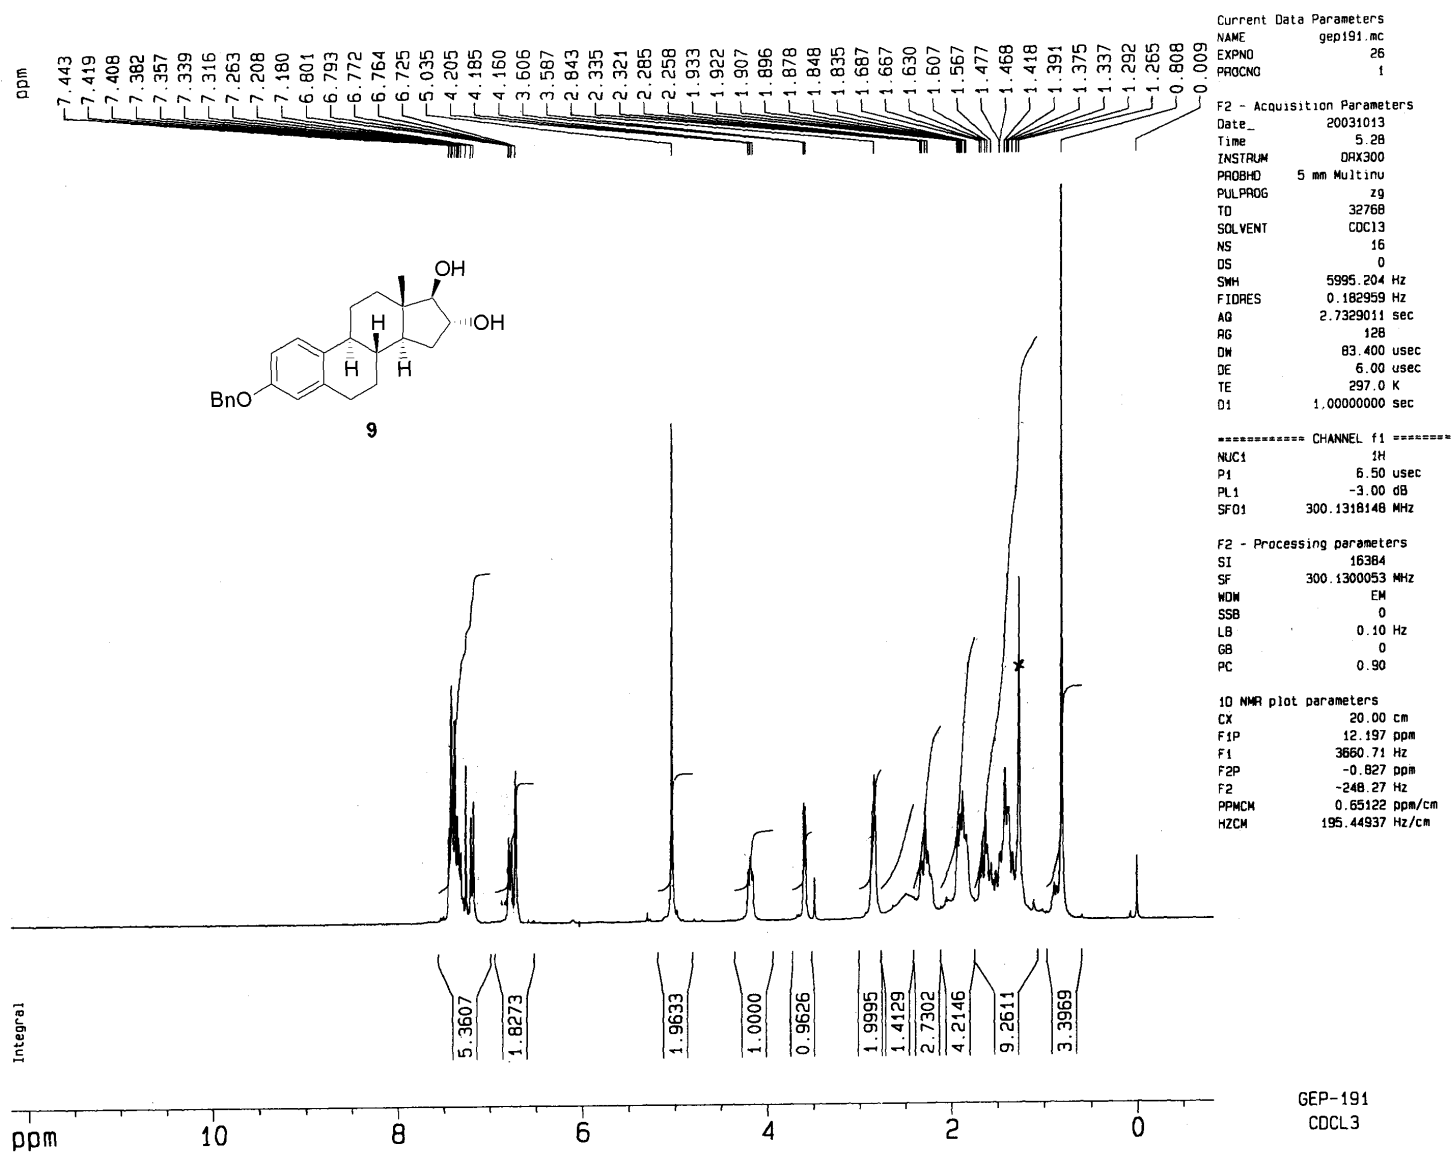

Fig. 1:  $^1\text{H}$  NMR Spectrum of Benzylated Estriol 9

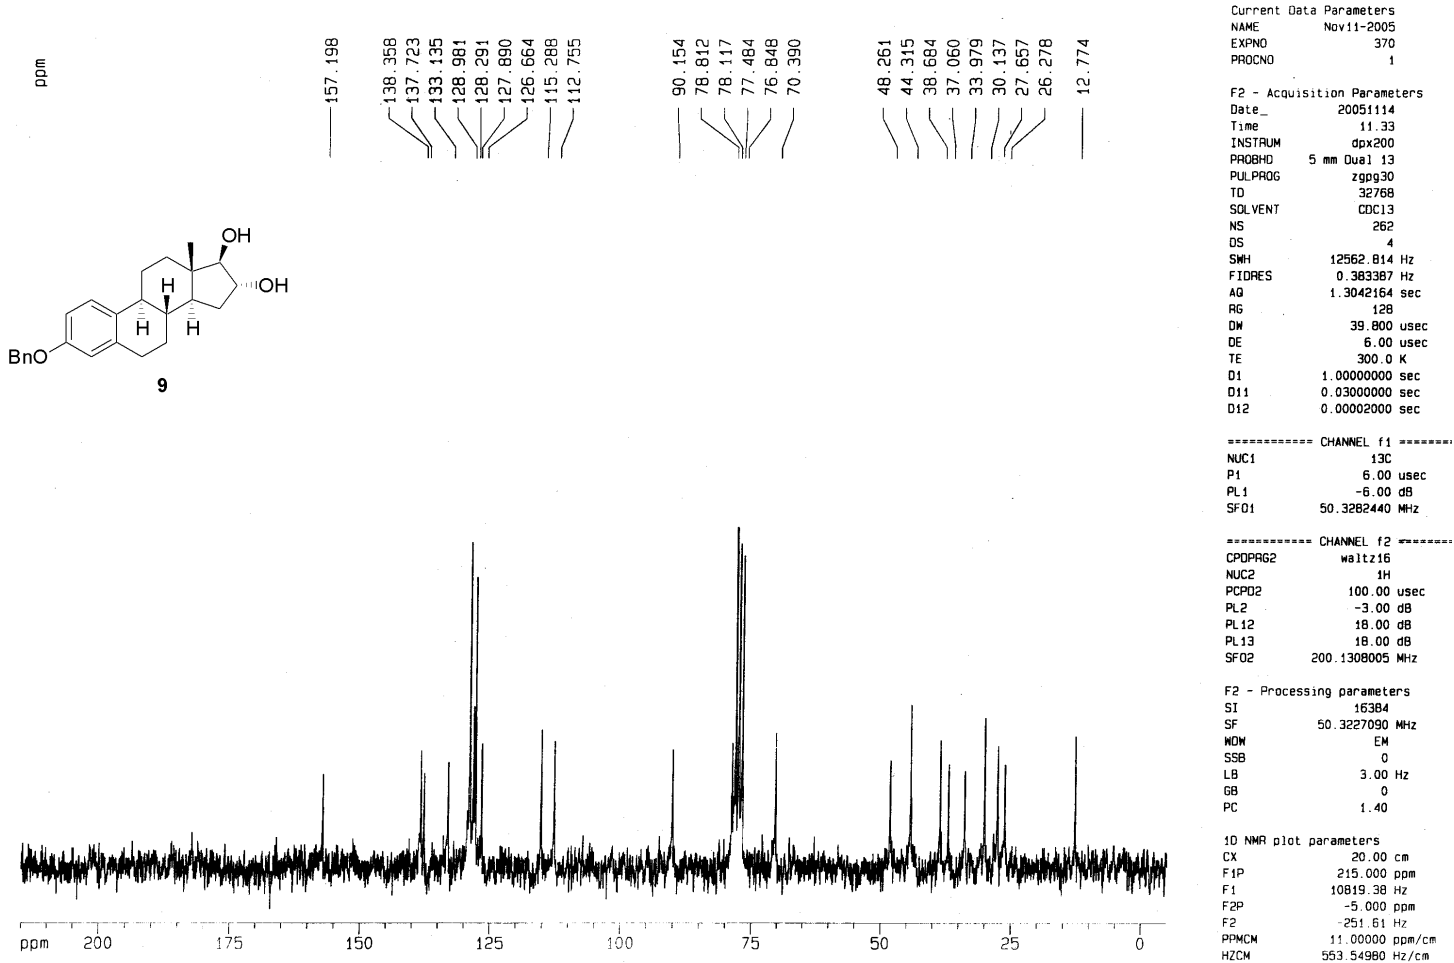

Fig. 2:  $^{13}\text{C}$  NMR Spectrum of Benzylated Estriol **9**

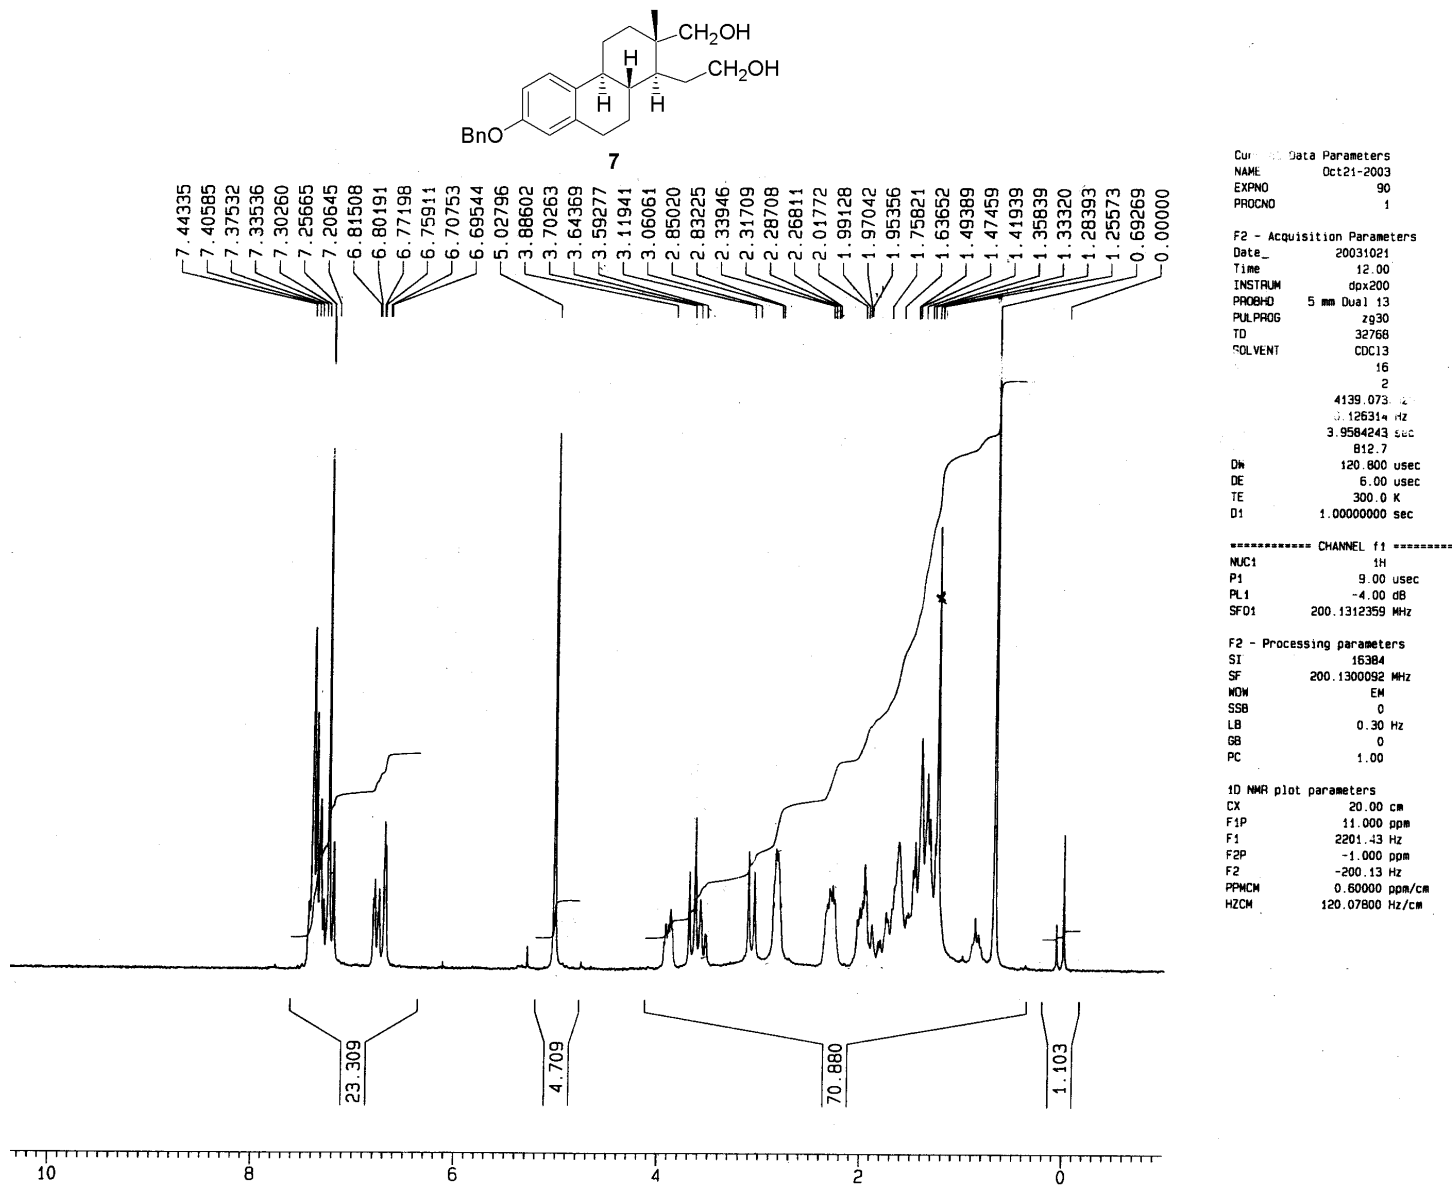

Fig. 3:  $^1\text{H}$  NMR Spectrum of Diol 7

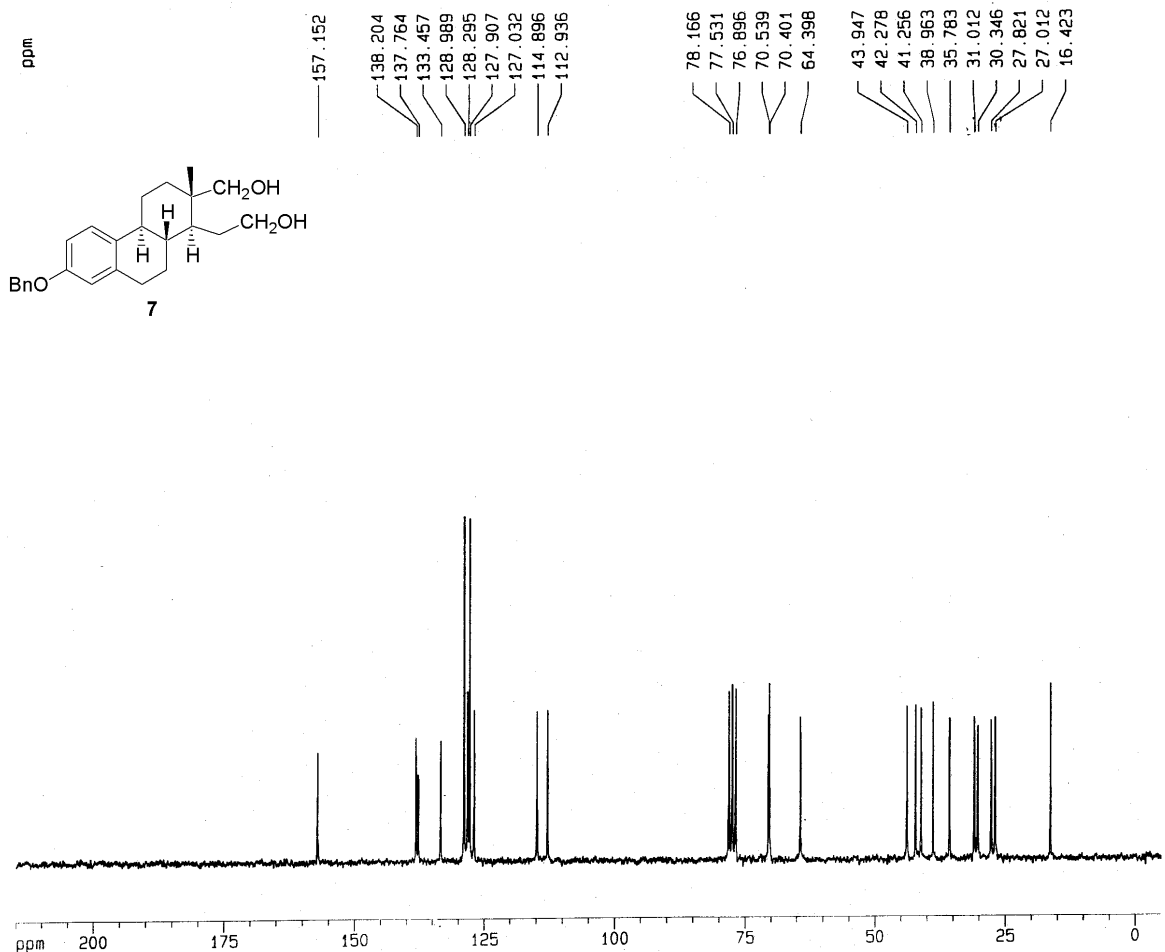

Current Data Parameters  
 NAME Nov11-2005  
 EXPNO 190  
 PROCNO 1

F2 - Acquisition Parameters  
 Date\_ 20051111  
 Time 22.27  
 INSTRUM gpc200  
 PROBHD 5 mm Dual 13  
 PULPROG zgpg30  
 TD 32768  
 SOLVENT CDCl3  
 NS 1024  
 DS 4  
 SMH 12562.814 Hz  
 FIDRES 0.383387 Hz  
 AQ 1.3042164 sec  
 RG 128  
 DM 39.800 usec  
 DE 6.00 usec  
 TE 300.0 K  
 D1 1.00000000 sec  
 D11 0.03000000 sec  
 D12 0.00002000 sec

----- CHANNEL f1 -----  
 NUC1 13C  
 P1 6.00 usec  
 PL1 -6.00 dB  
 SF01 50.3282440 MHz

----- CHANNEL f2 -----  
 CPDPRG2 waltz16  
 NUC2 1H  
 PCPD2 100.00 usec  
 PL2 -3.00 dB  
 PL12 18.00 dB  
 PL13 18.00 dB  
 SF02 200.1308005 MHz

F2 - Processing parameters  
 SI 16384  
 SF 50.3227090 MHz  
 MDW EM  
 SSB 0  
 LB 3.00 Hz  
 GB 0  
 PC 1.40

1D NMR plot parameters  
 CX 20.00 cm  
 F1P 215.000 ppm  
 F1 10819.38 Hz  
 F2P -5.000 ppm  
 F2 -251.51 Hz  
 PPMCM 11.00000 ppm/cm  
 HZCM 553.54980 Hz/cm

Fig. 4: <sup>13</sup>C NMR Spectrum of Diol 7

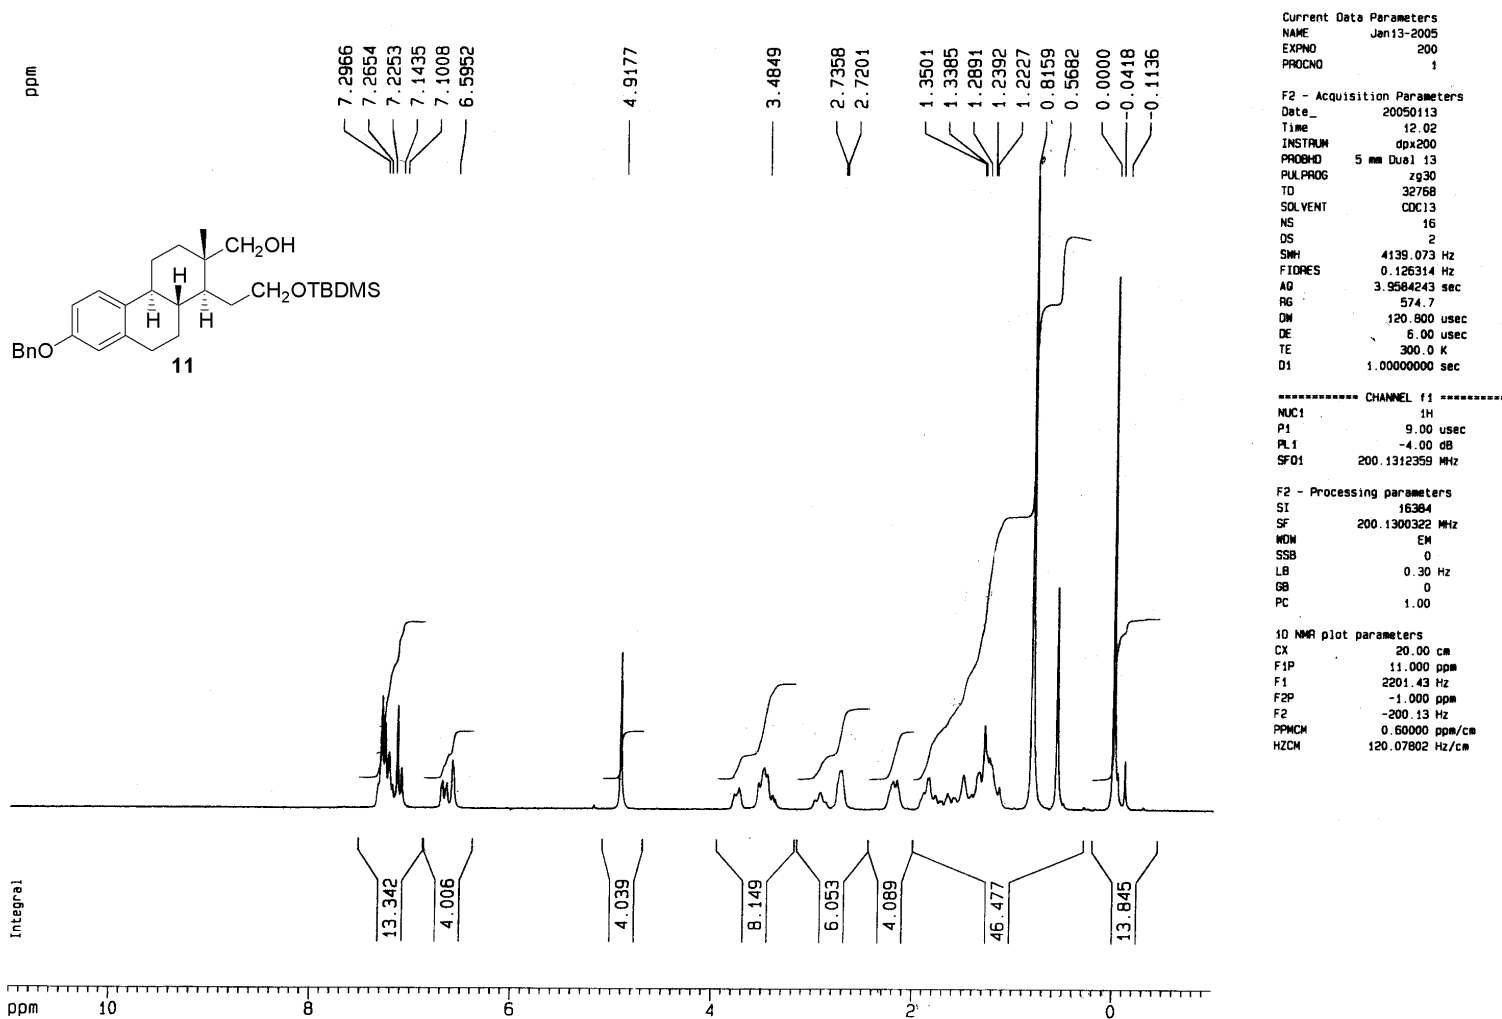

Fig. 5: <sup>1</sup>H NMR Spectrum of TBDMS Derivative 11

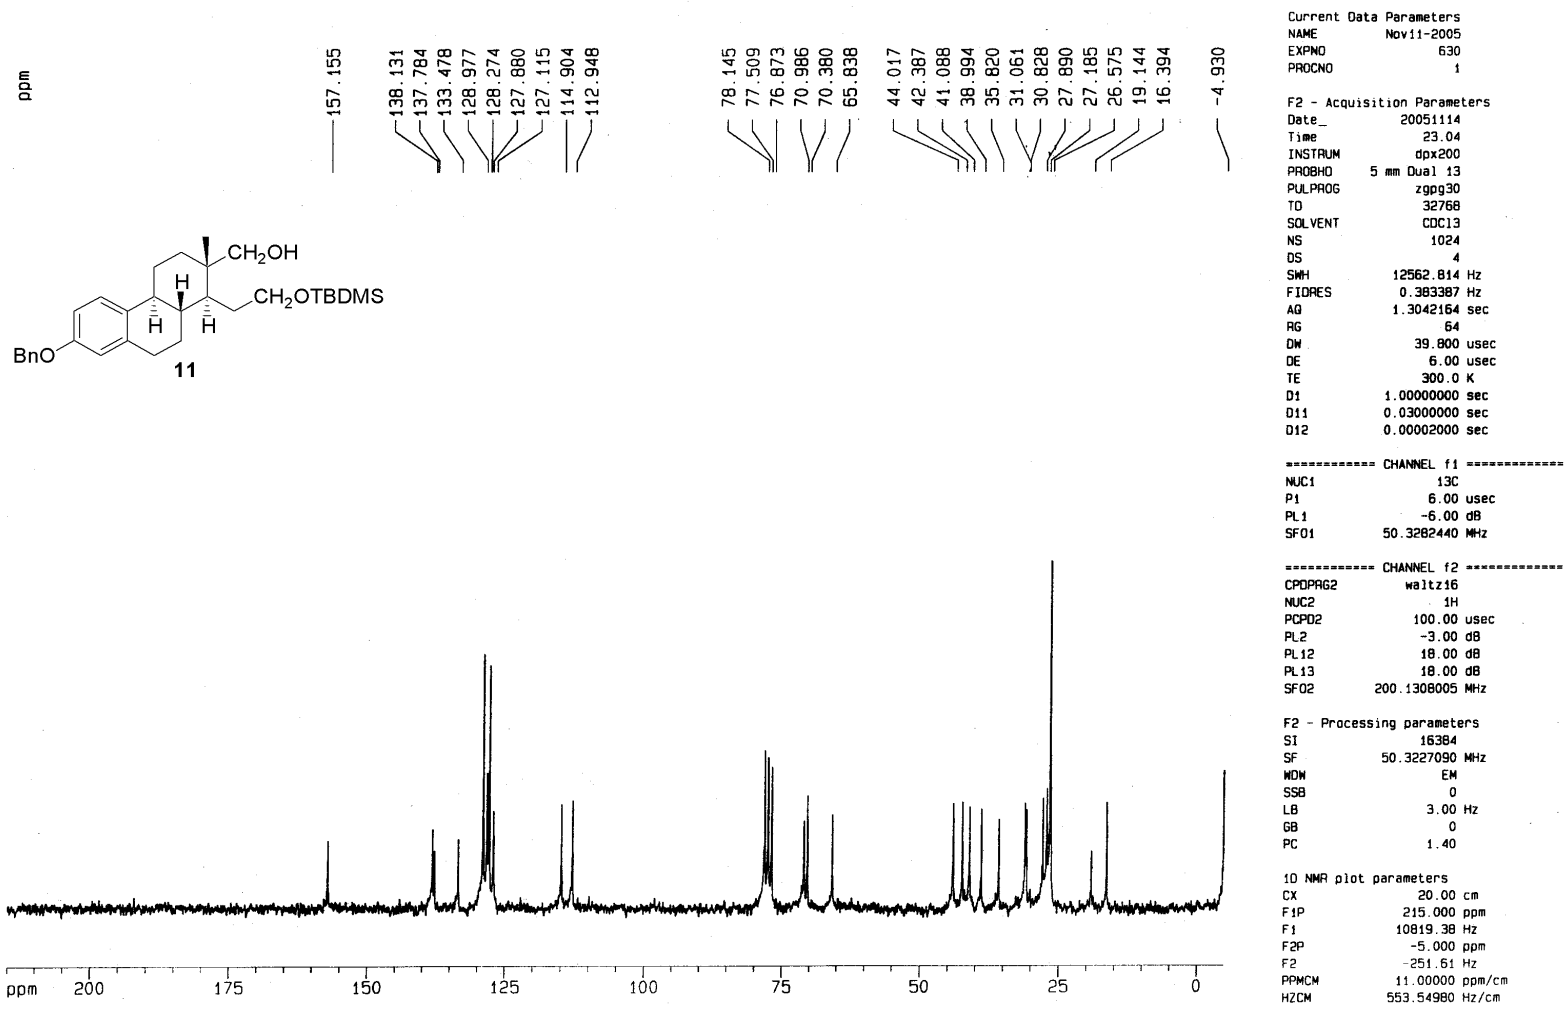

Fig. 6: <sup>13</sup>C NMR Spectrum of TBDMS Derivative **11**

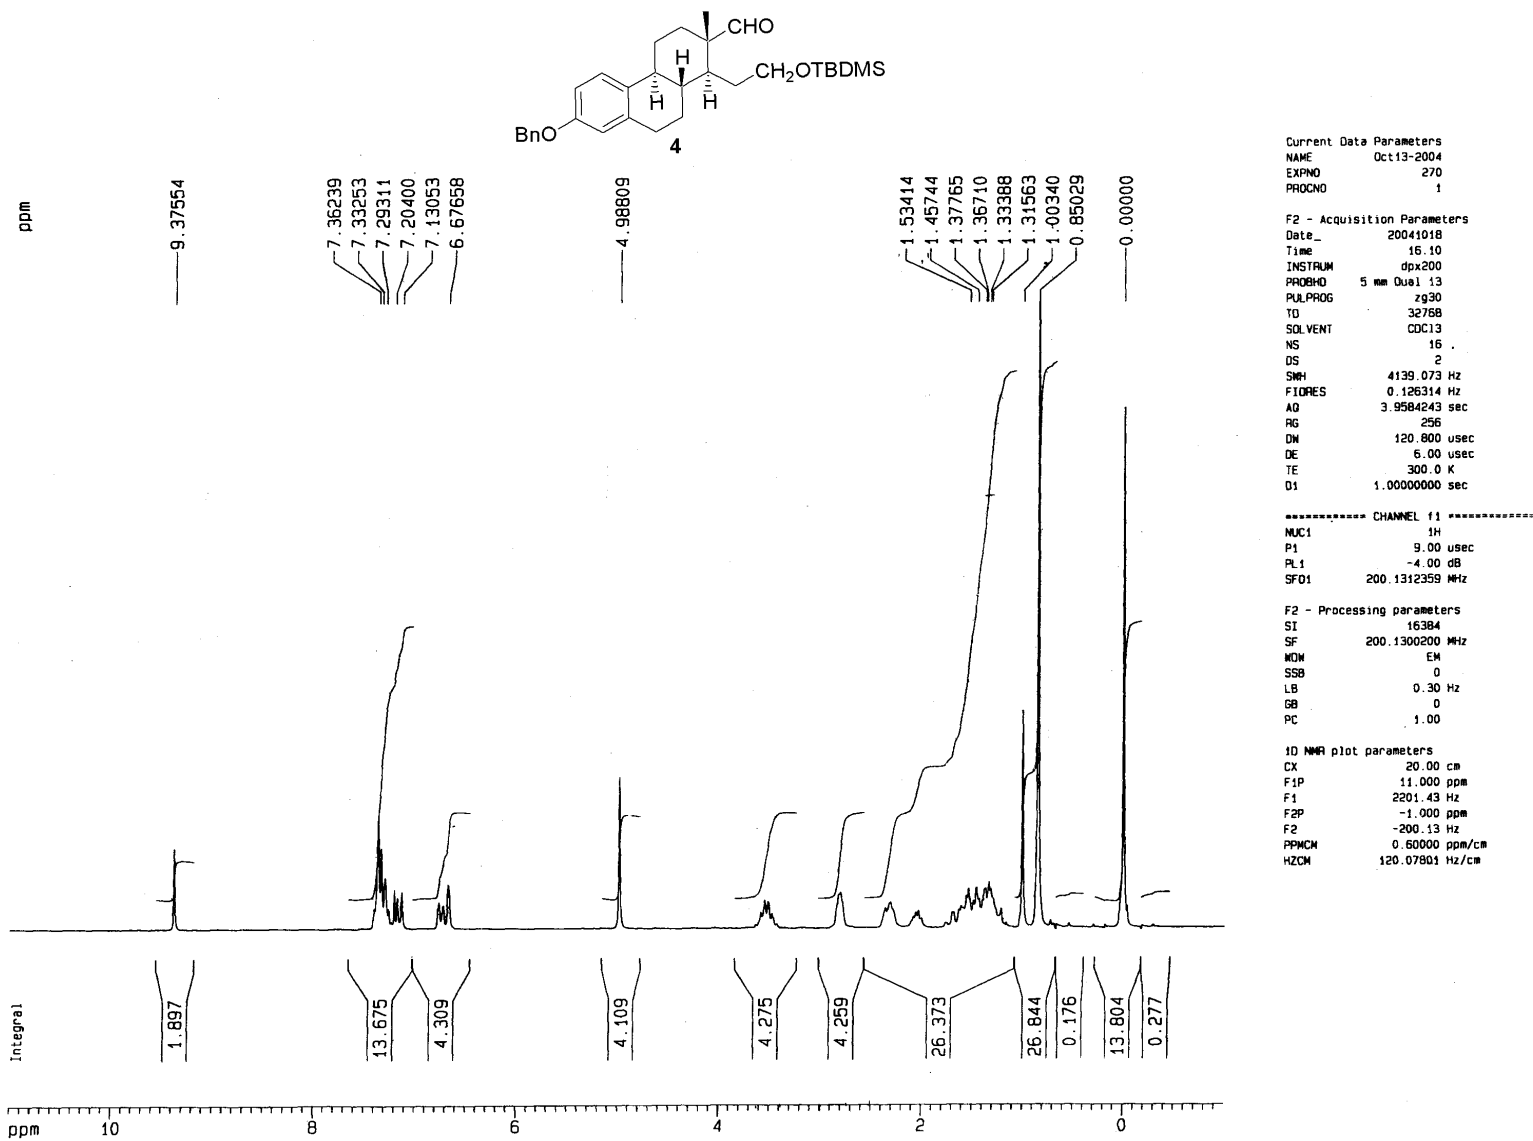

Fig. 7:  $^1\text{H}$  NMR Spectrum of Aldehyde 4



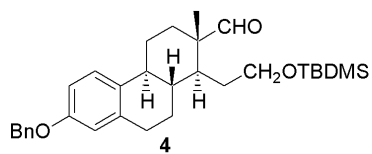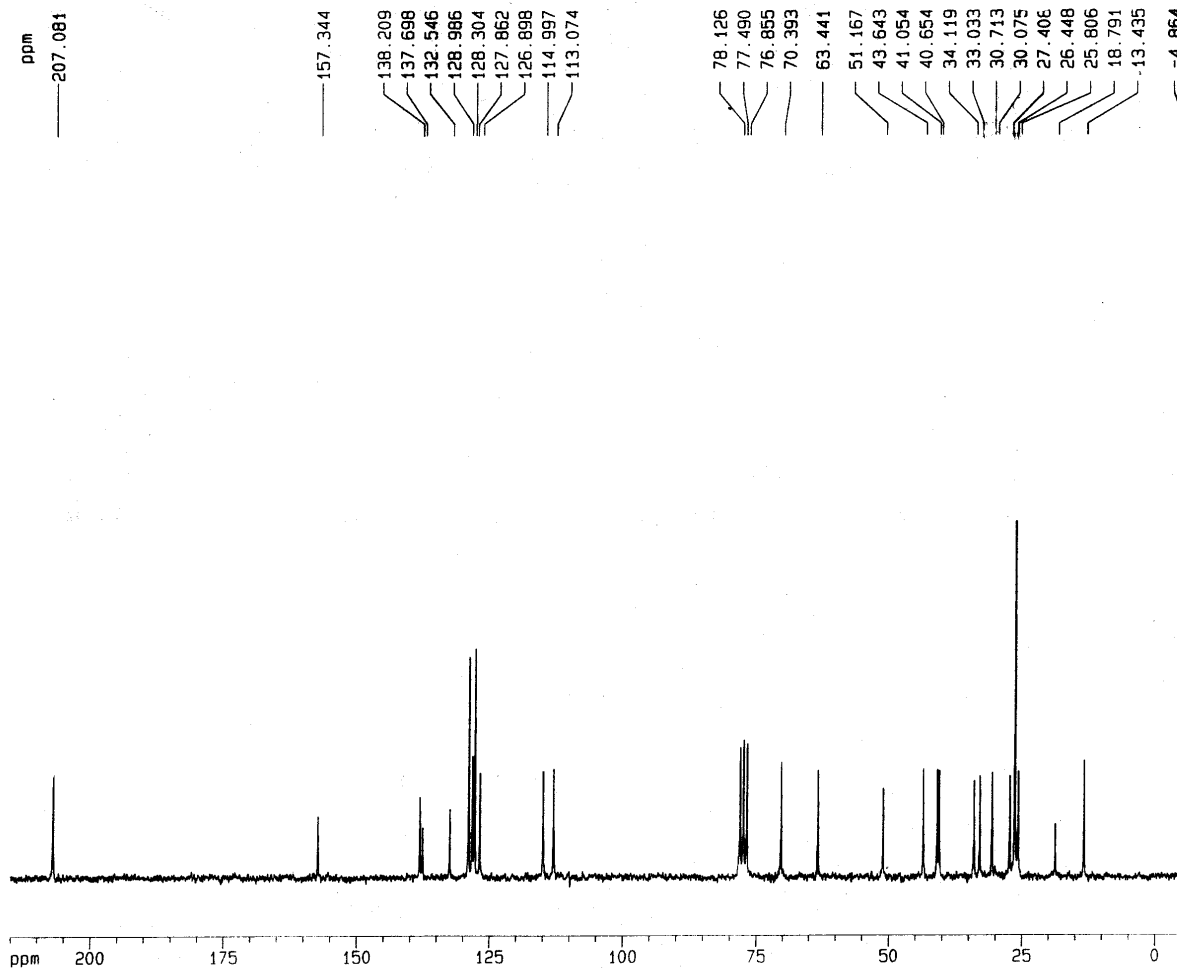

Current Data Parameters  
 NAME Nov11-2005  
 EXPNO 410  
 PROCNO 1

F2 - Acquisition Parameters  
 Date\_ 20051114  
 Time 13.46  
 INSTRUM dpx200  
 PROBHD 5 mm Dual 13  
 PULPROG zgpg30  
 TD 32768  
 SOLVENT CDCl3  
 NS 918  
 DS 4  
 SWH 12562.814 Hz  
 FIDRES 0.383387 Hz  
 AQ 1.3042164 sec  
 RG 64  
 DW 39.800 usec  
 DE 6.00 usec  
 TE 300.0 K  
 D1 1.0000000 sec  
 D11 0.0300000 sec  
 D12 0.0002000 sec

----- CHANNEL f1 -----  
 NUC1 13C  
 P1 6.00 usec  
 PL1 -6.00 dB  
 SF01 50.3282440 MHz

----- CHANNEL f2 -----  
 CPOPRG2 waltz16  
 NUC2 1H  
 PCPD2 100.00 usec  
 PL2 -3.00 dB  
 PL12 18.00 dB  
 PL13 18.00 dB  
 SF02 200.1308005 MHz

F2 - Processing parameters  
 SI 16384  
 SF 50.3227090 MHz  
 WDW EM  
 SSB 0  
 LB 3.00 Hz  
 GB 0  
 PC 1.40

10 NMR plot parameters  
 CX 20.00 cm  
 F1P 215.000 ppm  
 F1 10819.38 Hz  
 F2P -5.000 ppm  
 F2 -251.61 Hz  
 PPMCM 11.00000 ppm/cm  
 HZCM 553.54980 Hz/cm

Fig. 8:  $^{13}\text{C}$  NMR Spectrum of Aldehyde 4

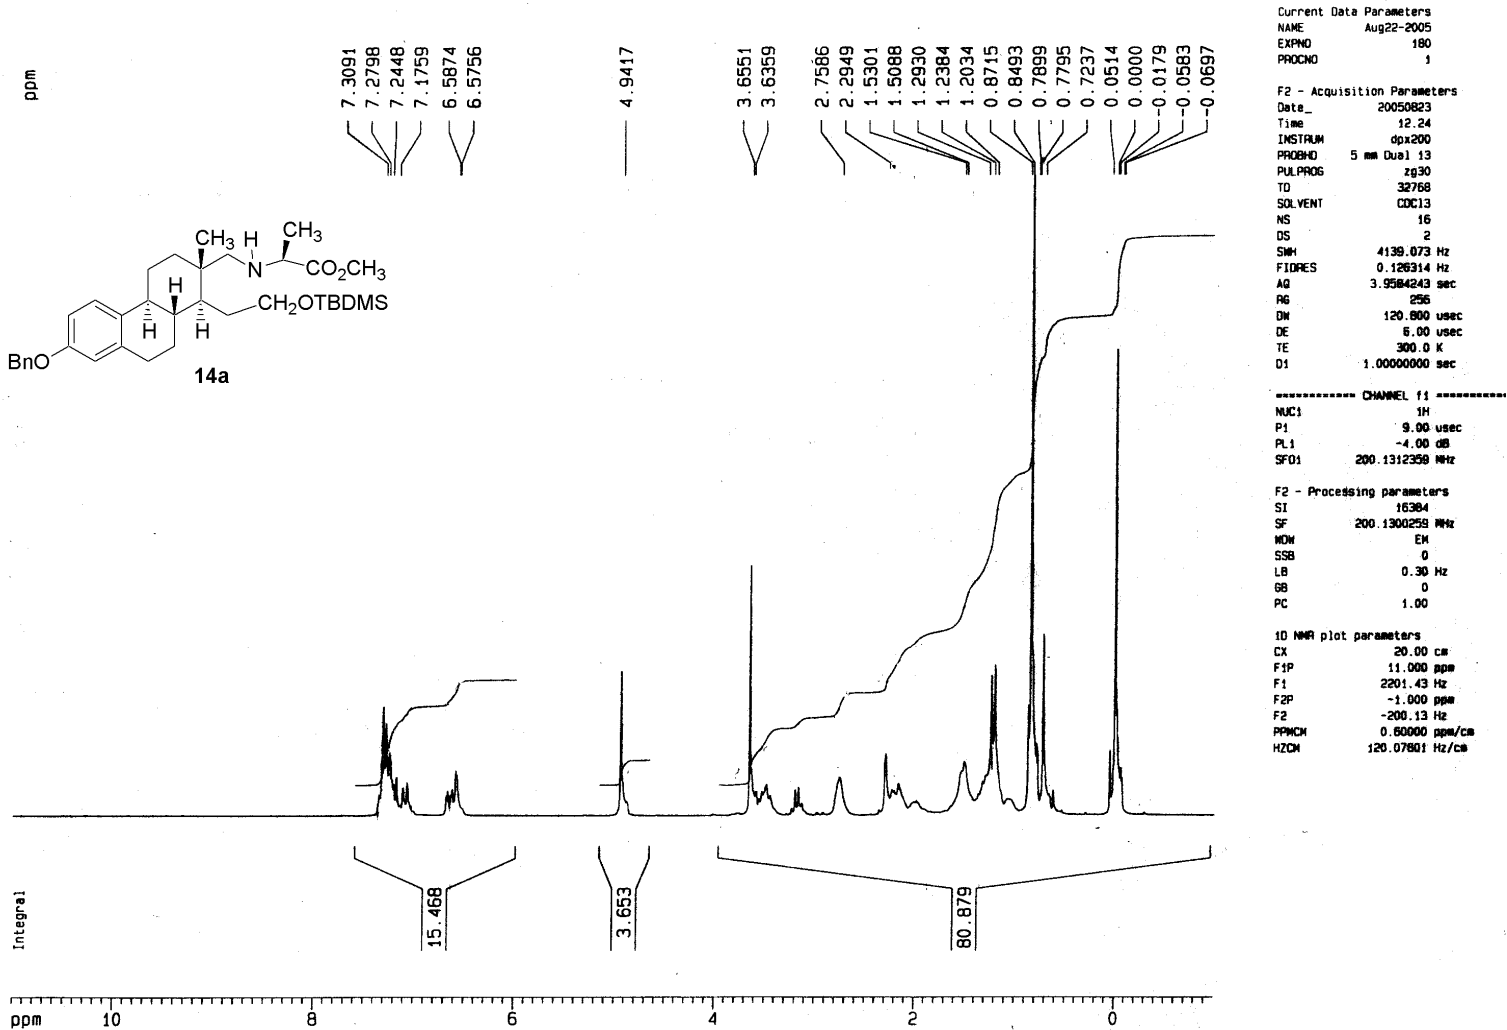

Fig. 9: <sup>1</sup>H NMR Spectrum of Amine 14a

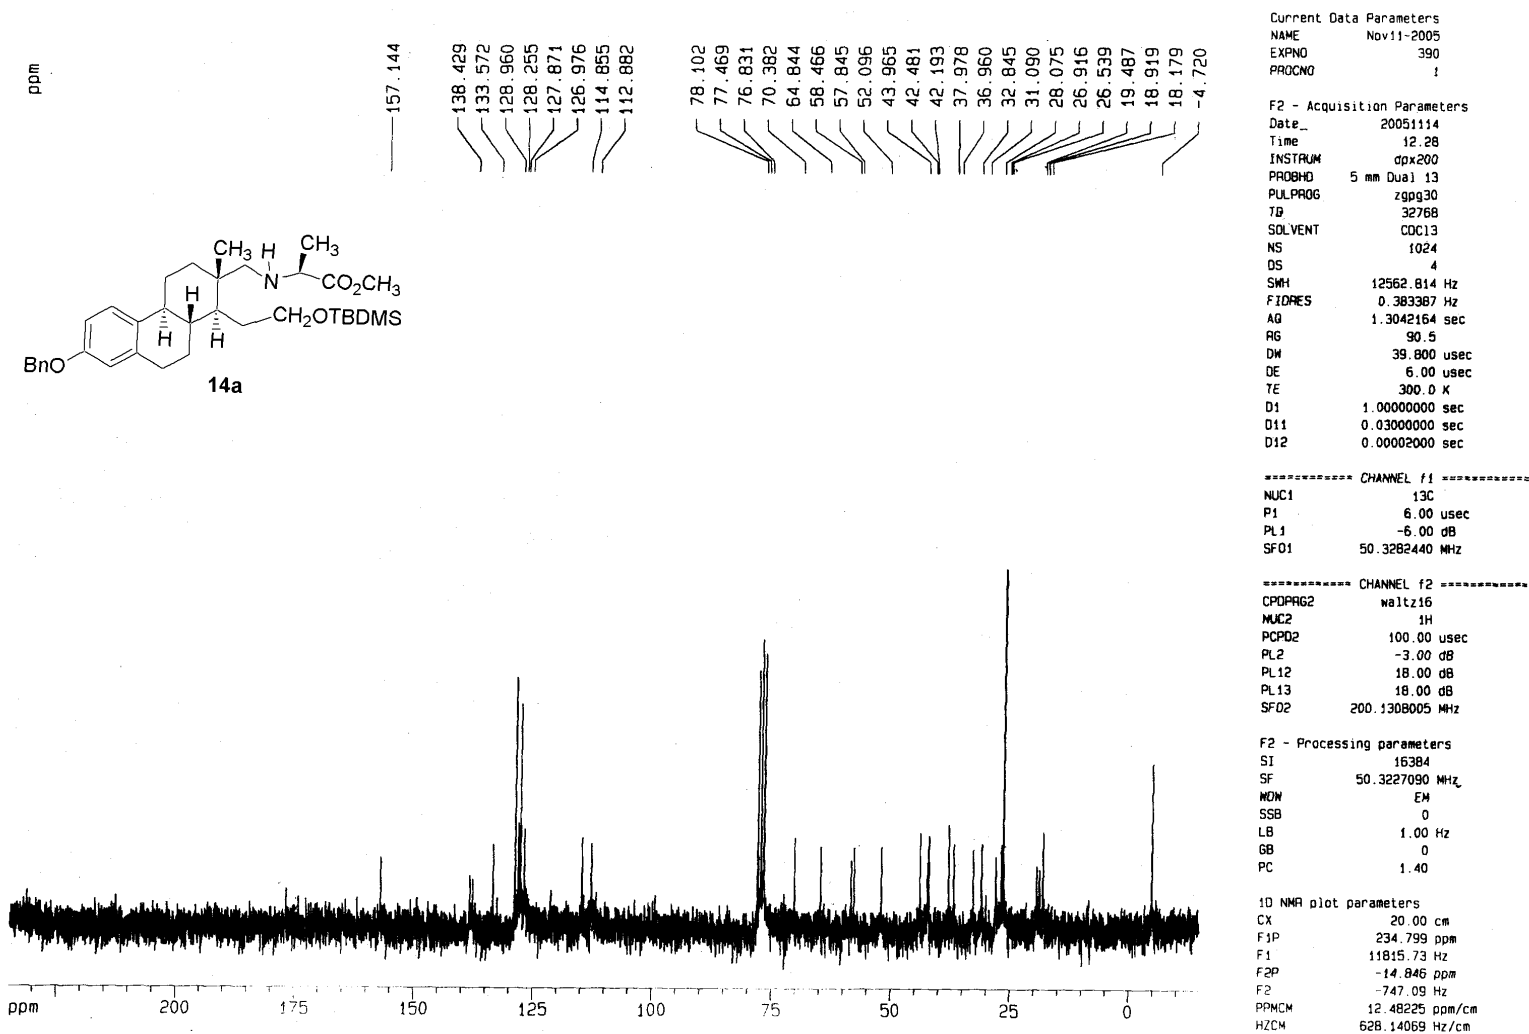

Fig. 10: <sup>13</sup>C NMR Spectra of Amine 14a

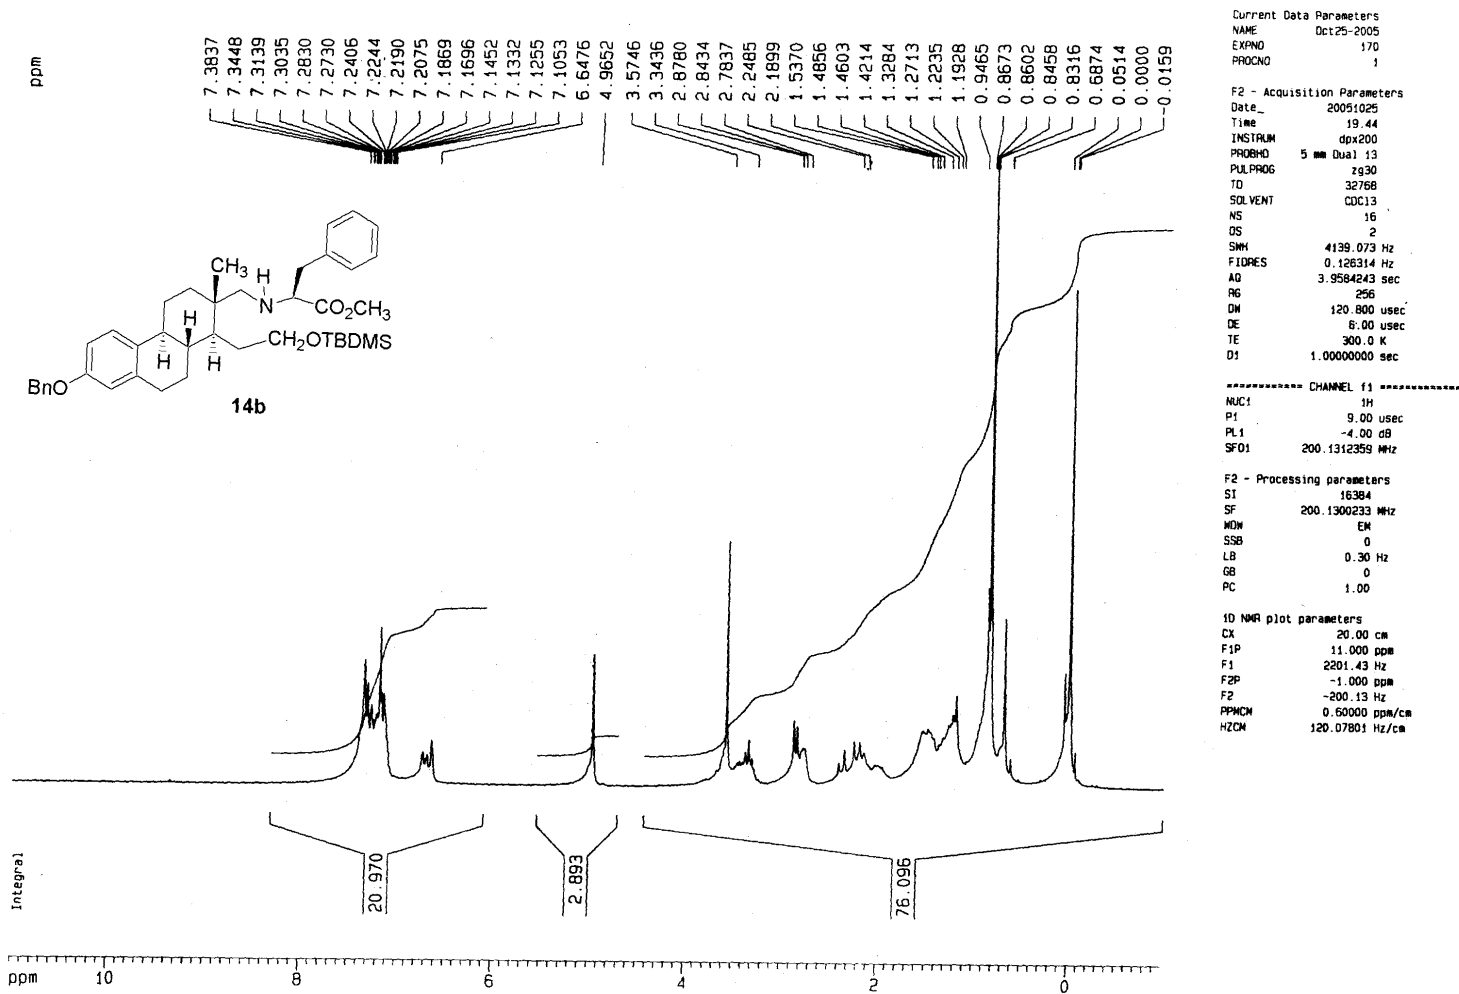

Fig. 11:  $^1\text{H}$  NMR Spectrum of Amine 14b

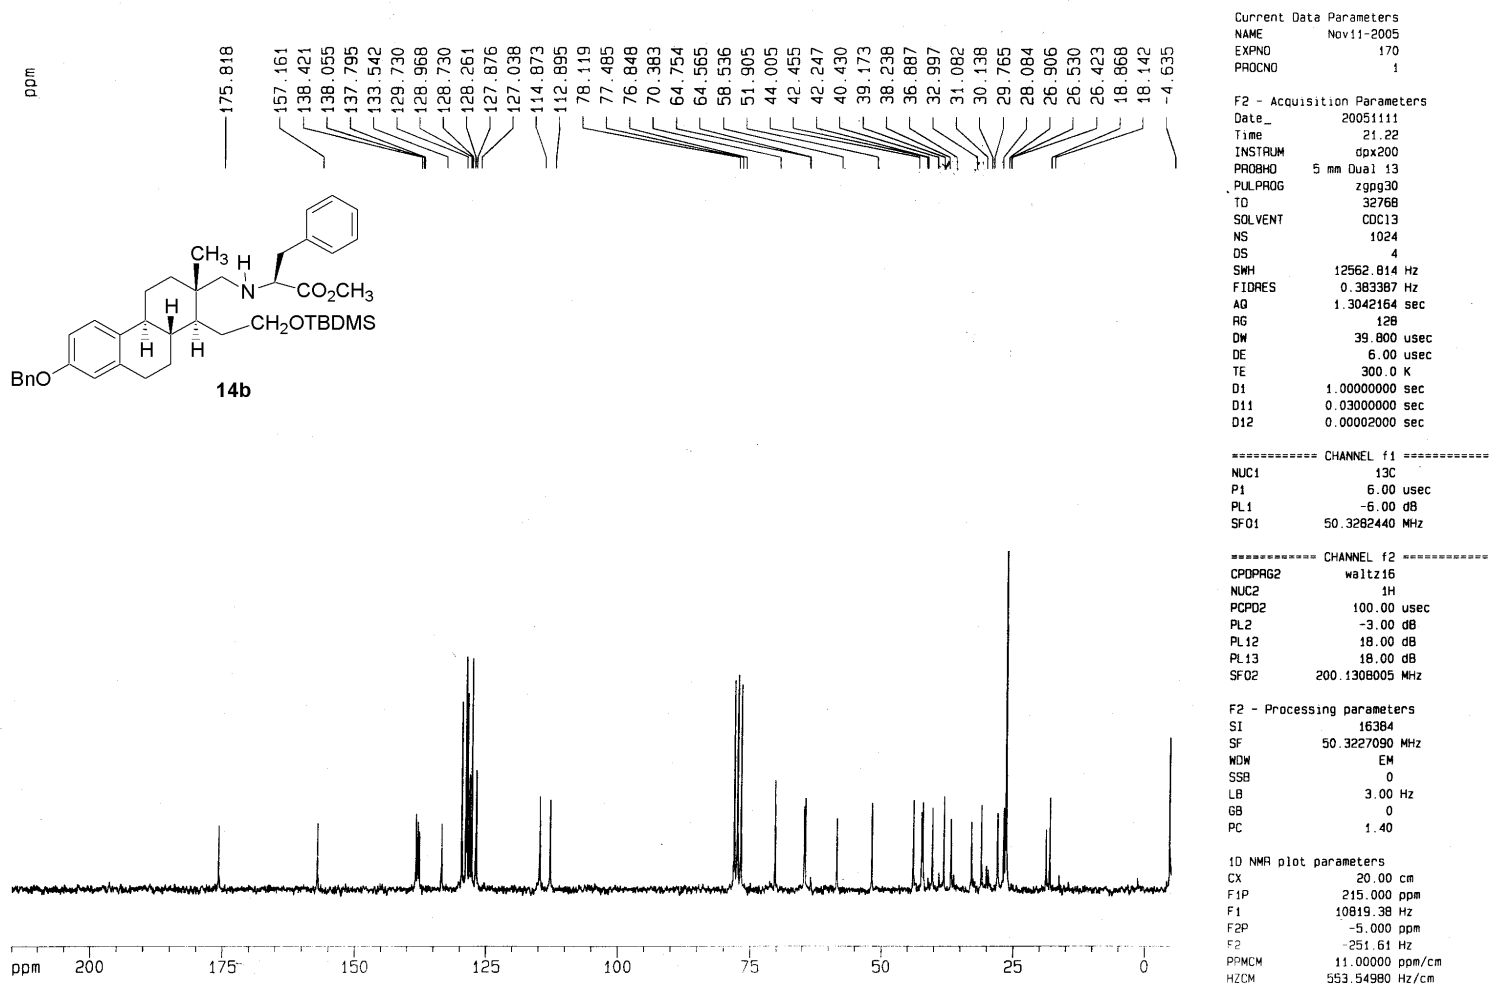

Fig. 12: <sup>13</sup>C NMR Spectrum of Amine 14b

SHG-596  
 PROTON CDC13 v ep 53

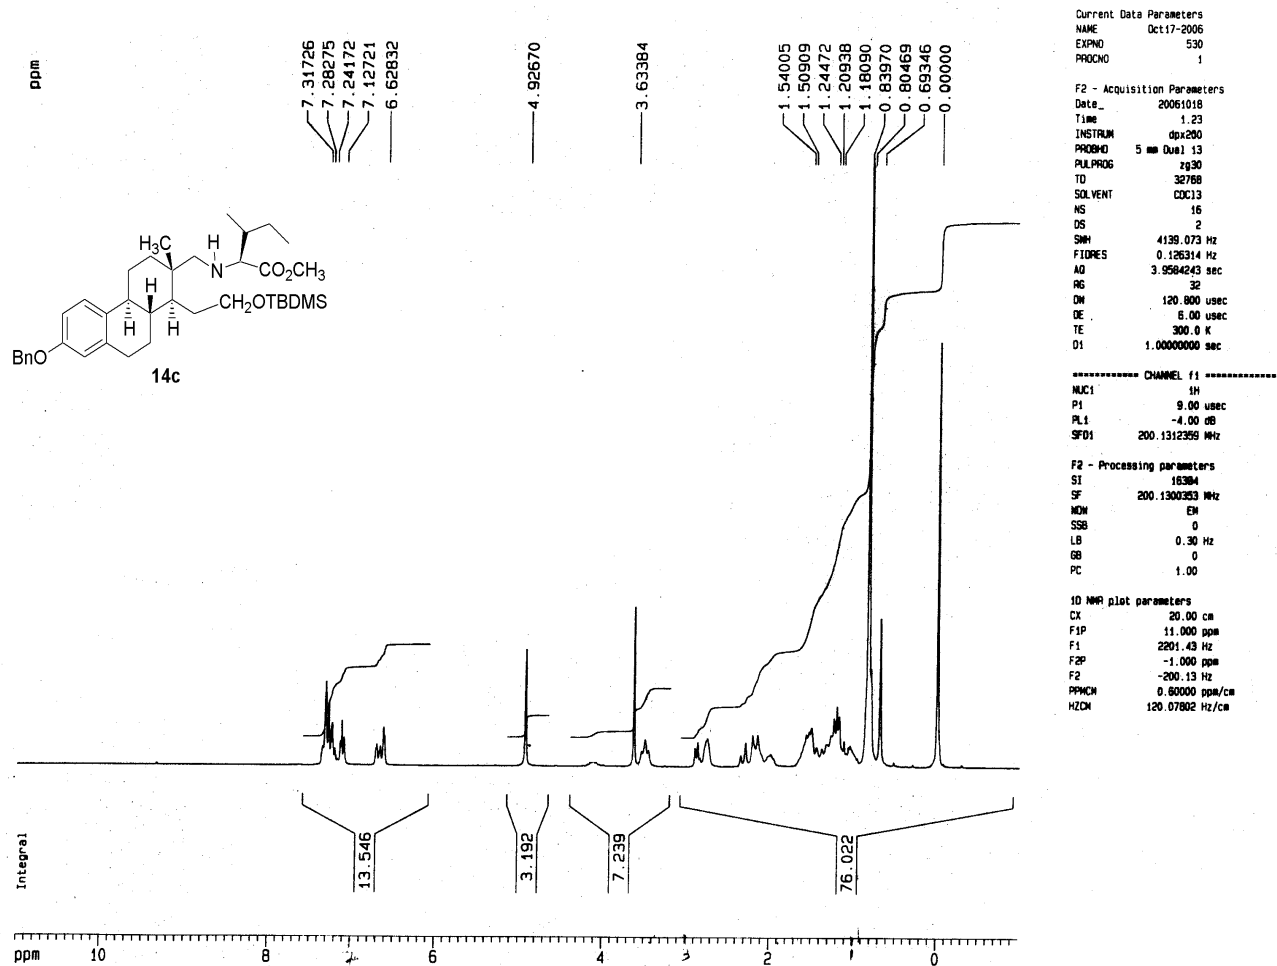

Fig. 13: <sup>1</sup>H NMR Spectrum of Amine 14c

SHG 596  
C13CPD.CDC13.v ep-18

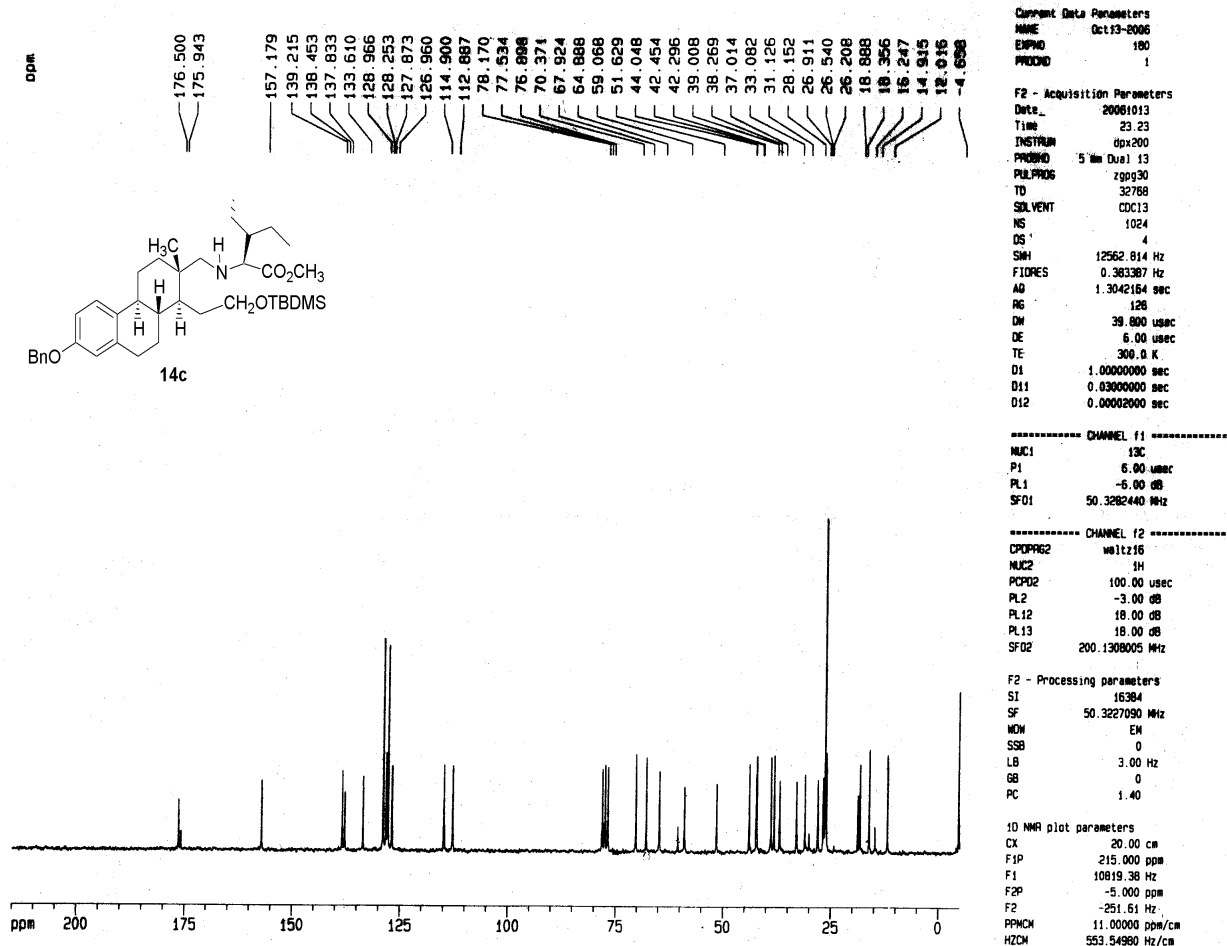

Fig. 14:  $^{13}\text{C}$  NMR Spectrum of Amine 14c

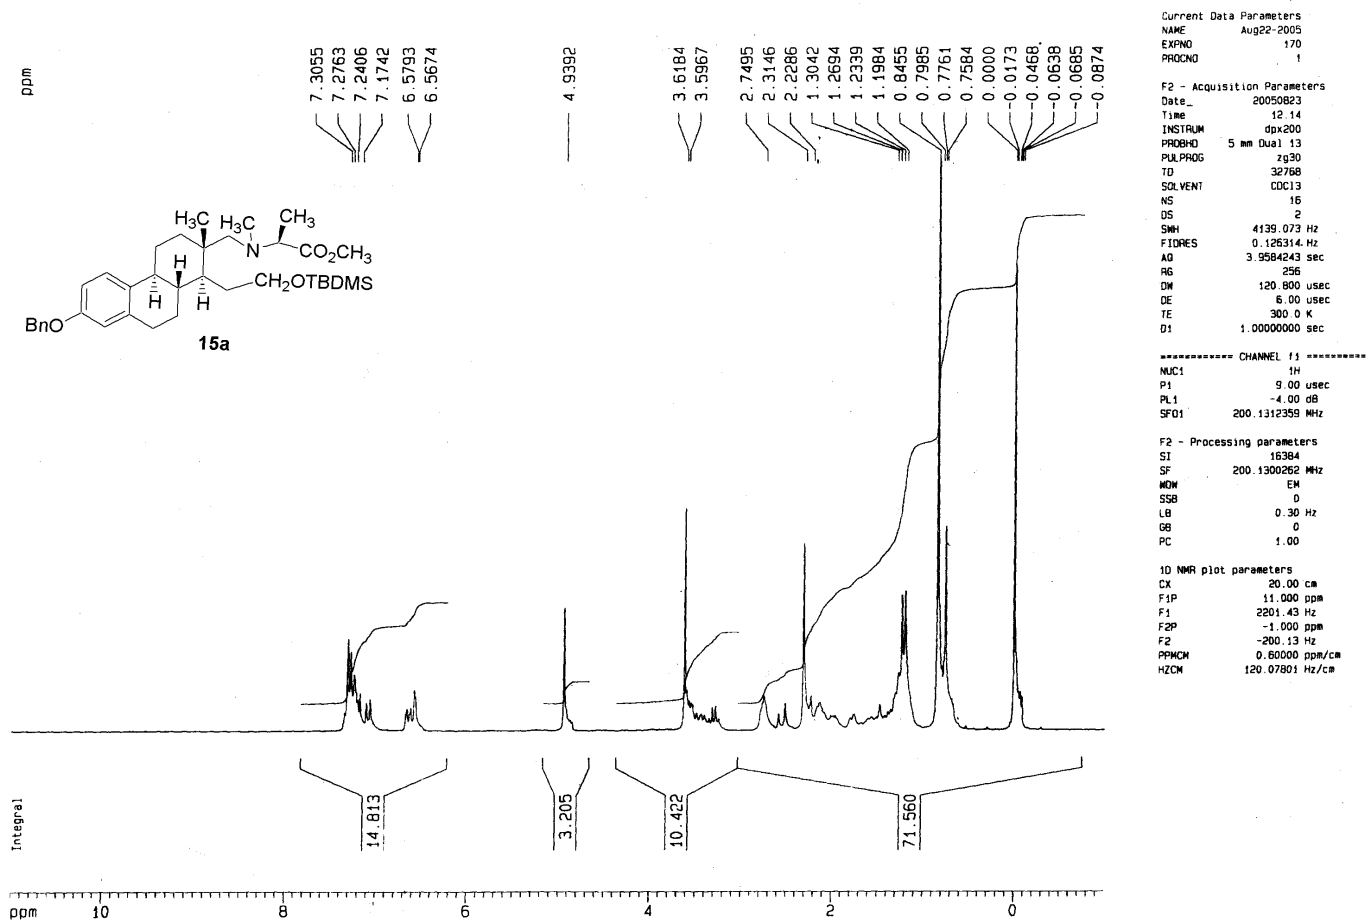

Fig. 15: <sup>1</sup>H NMR Spectrum of *N*-Methyl Amine Derivative 15a



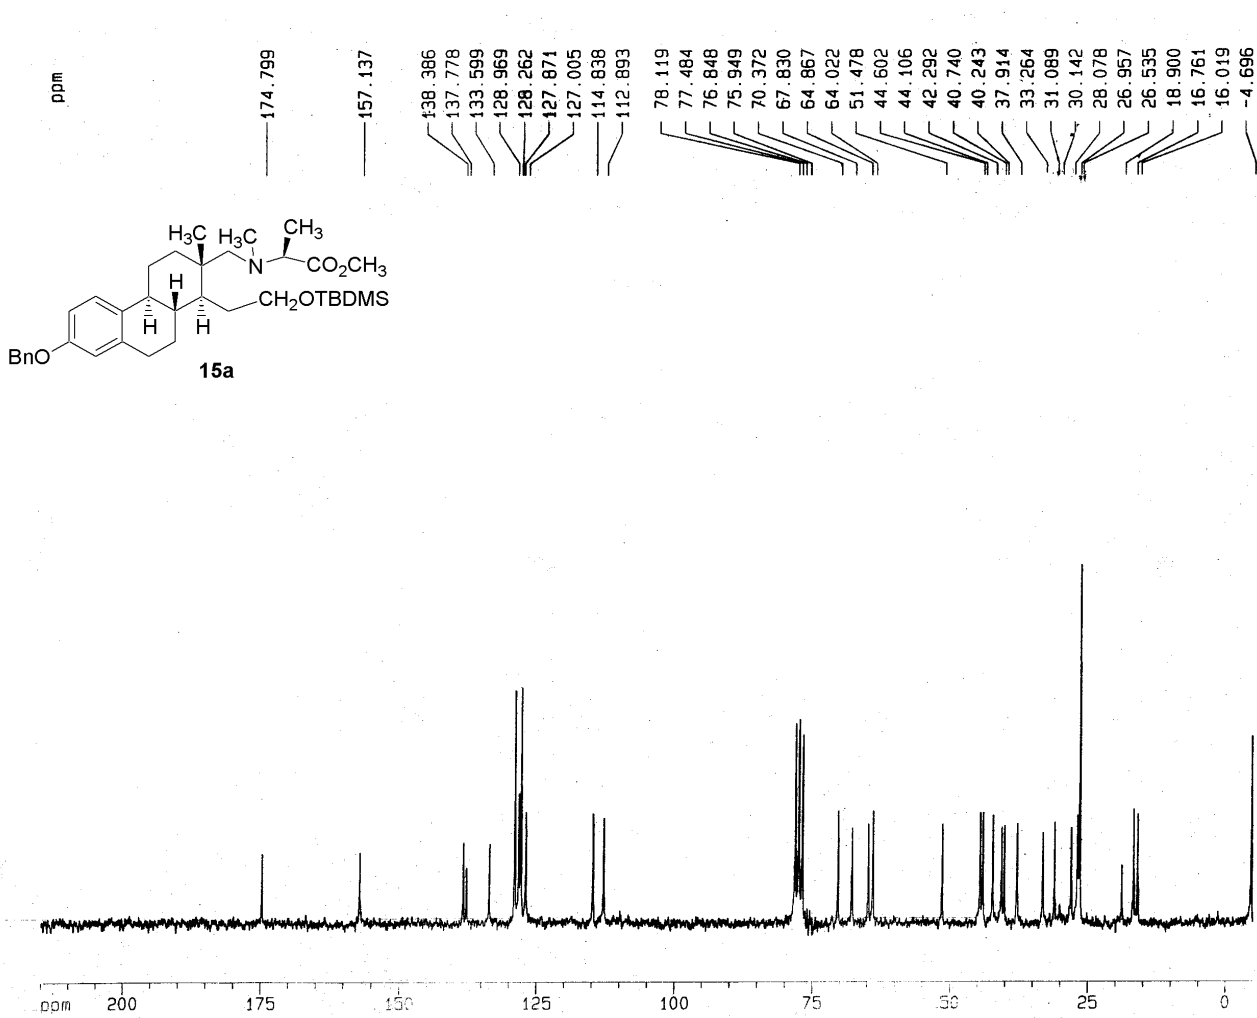

Current Data Parameters  
 NAME Nov18-2005  
 EXPNO 480  
 PROCNO 1

F2 - Acquisition Parameters  
 Date\_ 20051120  
 Time 7.51  
 INSTRUM dpx200  
 PROBHD 5 mm Dual 13  
 PULPROG zgpg30  
 TD 32768  
 SOLVENT CDC13  
 NS 1024  
 DS 4  
 SMH 12562.814 Hz  
 FIDRES 0.383387 Hz  
 AQ 1.3042164 sec  
 RG 128  
 DW 39.800 usec  
 DE 6.00 usec  
 TE 300.0 K  
 D1 1.0000000 sec  
 D11 0.0300000 sec  
 D12 0.00002000 sec

----- CHANNEL f1 -----  
 NUC1 13C  
 P1 6.00 usec  
 PL1 -6.00 dB  
 SFO1 50.3282440 MHz

----- CHANNEL f2 -----  
 CPOPRG2 waltz16  
 NUC2 1H  
 PCPD2 100.00 usec  
 PL2 -3.00 dB  
 PL12 18.00 dB  
 PL13 18.00 dB  
 SFO2 200.1308005 MHz

F2 - Processing parameters  
 SI 16384  
 SF 50.3227090 MHz  
 NDM EM  
 SSB 0  
 LB 3.00 Hz  
 GB 0  
 PC 1.40

1D NMR plot parameters  
 CX 20.00 cm  
 F1P 215.000 ppm  
 F1 10819.38 Hz  
 F2P -5.000 ppm  
 F2 -251.61 Hz  
 PPMCM 11.00000 ppm/cm  
 HZCM 553.54980 Hz/cm

Fig. 16: <sup>13</sup>C NMR Spectrum of *N*-Methyl Amine Derivative **15a**

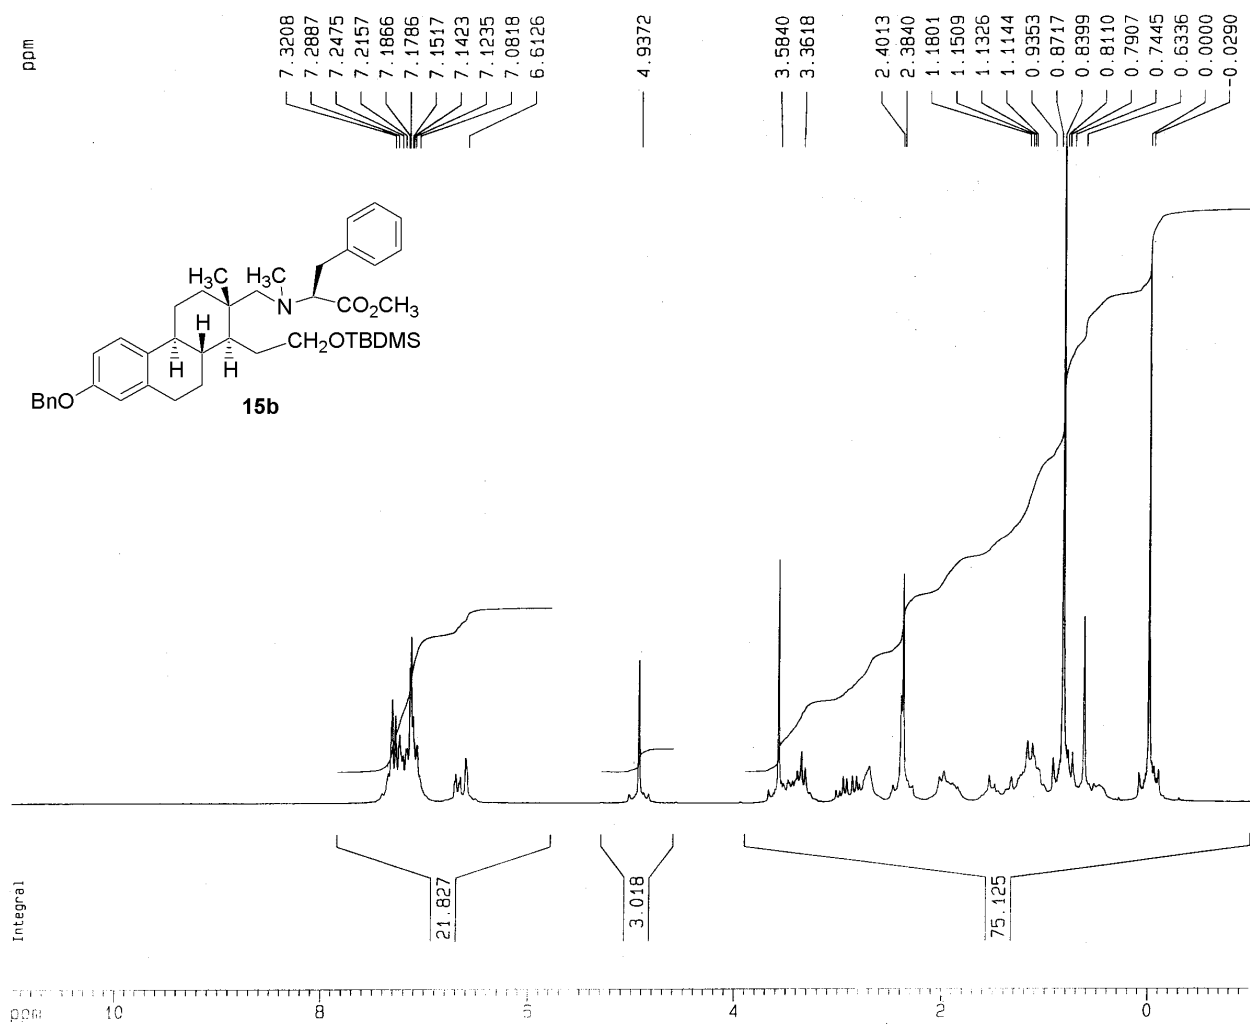

Current Data Parameters  
 NAME Nov16-2005  
 EXPNO 330  
 PROCNO 1

F2 - Acquisition Parameters  
 Date\_ 20051116  
 Time 19.59  
 INSTRUM dpx200  
 PROBHD 5 mm Dual 13  
 PULPROG zg30  
 TD 32768  
 SOLVENT CDCl3  
 NS 16  
 DS 2  
 SMH 4139.073 Hz  
 FIDRES 0.126314 Hz  
 AQ 3.9584243 sec  
 RG 128  
 DM 120.800 usec  
 DE 6.00 usec  
 TE 300.0 K  
 D1 1.00000000 sec

\*\*\*\*\* CHANNEL f1 \*\*\*\*\*  
 NUC1 1H  
 P1 9.00 usec  
 PL1 -4.00 dB  
 SFO1 200.1312359 MHz

F2 - Processing parameters  
 SI 15384  
 SF 200.1300324 MHz  
 WDW EM  
 SSB 0  
 LB 0.30 Hz  
 GB 0  
 PC 1.00

1D NMR plot parameters  
 CX 20.00 cm  
 F1P 11.000 ppm  
 F1 2201.43 Hz  
 F2P -1.000 ppm  
 F2 -200.13 Hz  
 PPMCM 0.60000 ppm/cm  
 HZCM 120.07802 Hz/cm

Fig. 17: <sup>1</sup>H NMR Spectrum of *N*-Methyl Amine Derivative **15b**

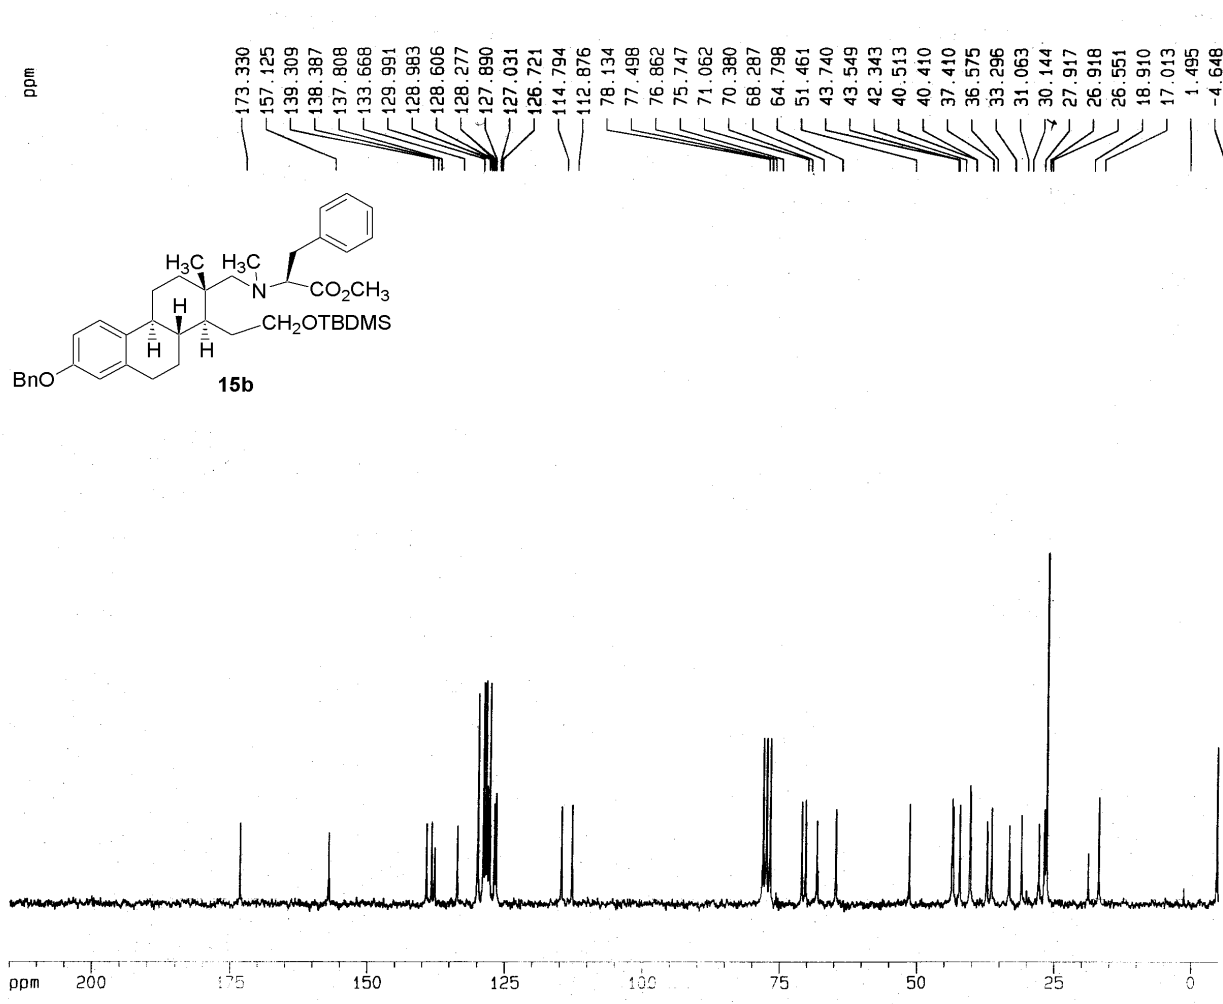

Current Data Parameters  
 NAME Nov18-2005  
 EXPNO 240  
 PROCNO 1

F2 - Acquisition Parameters  
 Date\_ 20051119  
 Time 18.11  
 INSTRUM dpx200  
 PROBHD 5 mm Dual 13  
 PULPROG zgpg30  
 TD 32768  
 SOLVENT CDC13  
 NS 1024  
 DS 4  
 SWH 12562.814 Hz  
 FIDRES 0.383387 Hz  
 AQ 1.3042164 sec  
 RG 64  
 DM 39.800 usec  
 DE 6.00 usec  
 TE 300.0 K  
 D1 1.00000000 sec  
 D11 0.03000000 sec  
 D12 0.00002000 sec

\*\*\*\*\* CHANNEL f1 \*\*\*\*\*  
 NUC1 13C  
 P1 6.00 usec  
 PL1 -6.00 dB  
 SFO1 50.3282440 MHz

\*\*\*\*\* CHANNEL f2 \*\*\*\*\*  
 CPOPRG2 waltz16  
 NUC2 1H  
 PCPD2 100.00 usec  
 PL2 -3.00 dB  
 PL12 18.00 dB  
 PL13 18.00 dB  
 SFO2 200.1308005 MHz

F2 - Processing parameters  
 SI 16384  
 SF 50.3227090 MHz  
 WDW EM  
 SSB 0  
 LB 3.00 Hz  
 GB 0  
 PC 1.40

1D NMR plot parameters  
 CX 20.00 cm  
 F1 215.000 ppm  
 F1 10819.38 Hz  
 F2 -5.000 ppm  
 F2 -251.61 Hz  
 PPMCM 11.00000 ppm/cm  
 HZCM 553.54980 Hz/cm

Fig. 18: <sup>13</sup>C NMR Spectrum of *N*-Methyl Amine Derivative **15b**

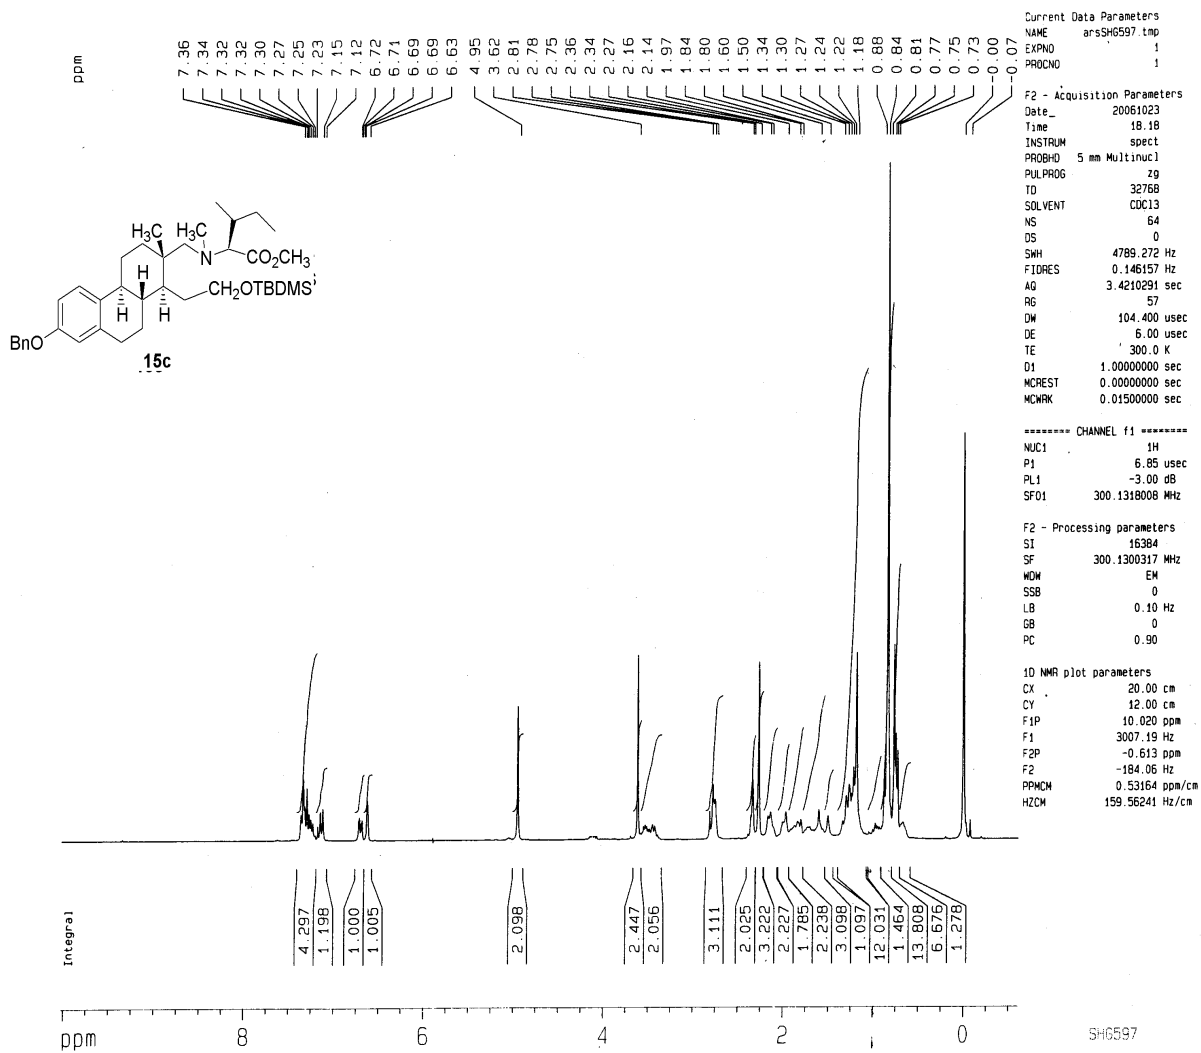

Fig. 19: <sup>1</sup>H NMR Spectrum of *N*-Methyl Amine Derivative **15c**

SHG597

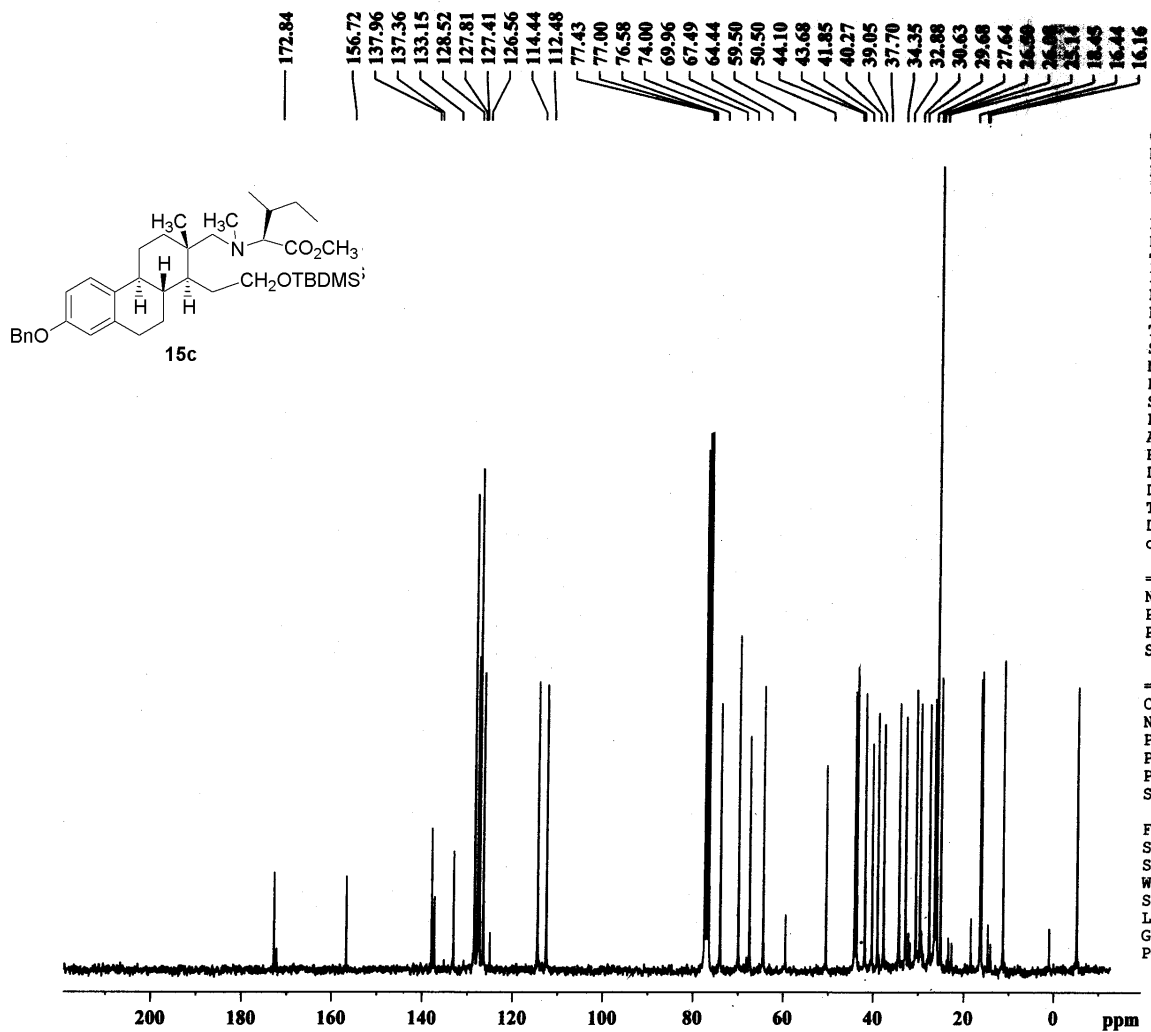

Current Data Parameters  
 NAME arsSHG597.tmp  
 EXPNO 2  
 PROCNO 1

F2 - Acquisition Parameters  
 Date 20061023  
 Time 18.23  
 INSTRUM spect  
 PROBHD 5 mm Multinucl  
 PULPROG zgdcu  
 TD 32768  
 SOLVENT CDC13  
 NS 10800  
 DS 0  
 SWH 19960.080 Hz  
 FIDRES 0.609133 Hz  
 AQ 0.8208884 sec  
 RG 11585.2  
 DW 25.050 usec  
 DE 6.00 usec  
 TE 300.0 K  
 D1 2.00000000 sec  
 d11 0.03000000 sec

===== CHANNEL f1 =====  
 NUC1 13C  
 P1 10.00 usec  
 PL1 -3.00 dB  
 SFO1 75.4767751 MHz

===== CHANNEL f2 =====  
 CPDPRG2 waltz16  
 NUC2 1H  
 PCPD2 100.00 usec  
 PL2 -3.00 dB  
 PL12 20.00 dB  
 SFO2 300.1319936 MHz

F2 - Processing parameters  
 SI 16384  
 SF 75.4677503 MHz  
 WDW EM  
 SSB 0  
 LB 3.00 Hz  
 GB 0  
 PC 1.50

Fig. 20: <sup>13</sup>C NMR Spectrum of *N*-Methyl Amine Derivative 15c

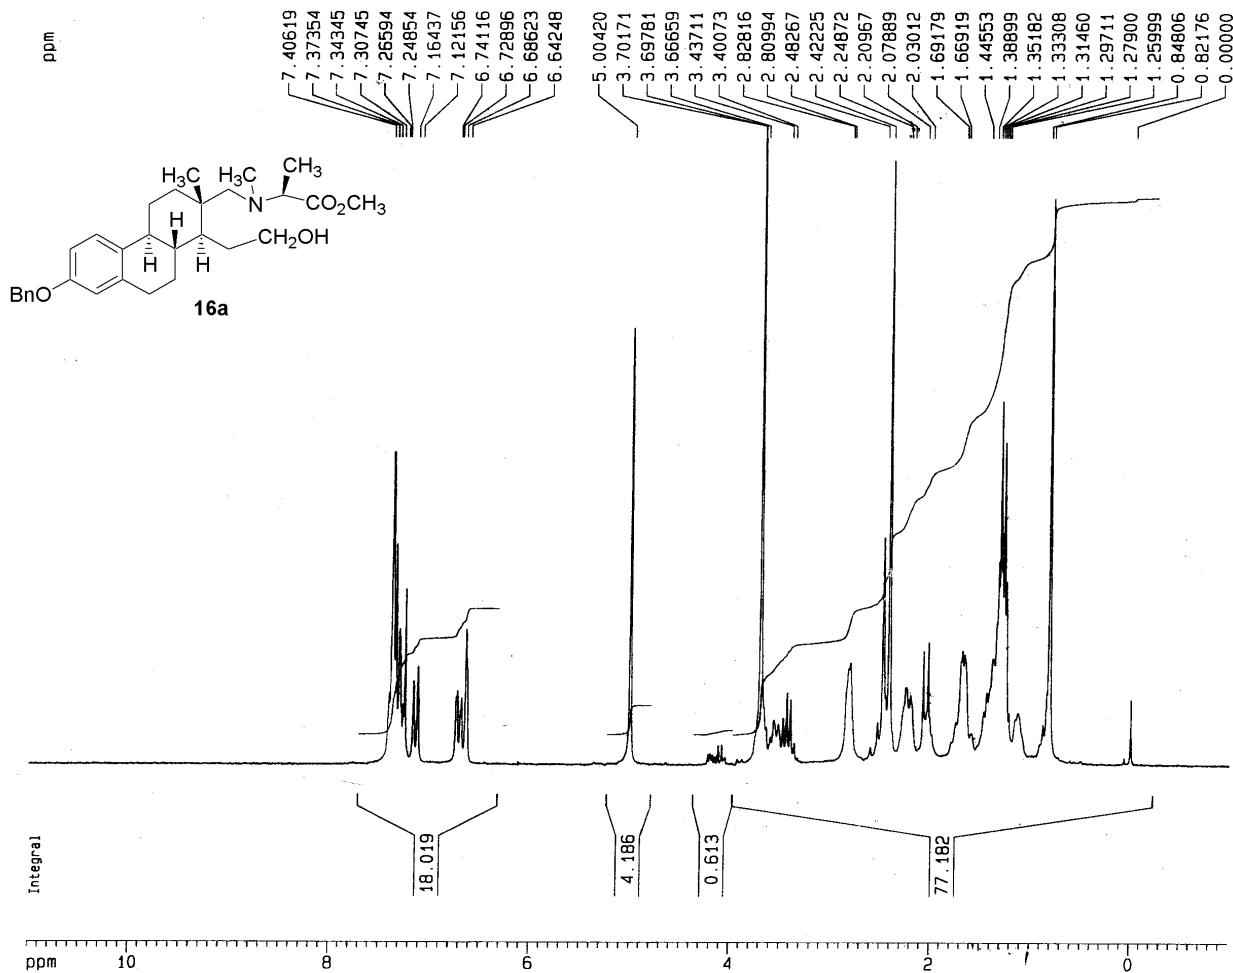

Current Data Parameters  
 NAME Aug23-2005  
 EXPNO 190  
 PROCNO 1

F2 - Acquisition Parameters  
 Date\_ 20050825  
 Time 14:19  
 INSTRUM dpx200  
 PROBRD 5 mm Dux13  
 PULPROG zg30  
 TD 32768  
 SOLVENT CDCl3  
 NS 16  
 DS 2  
 SMH 4139.073 Hz  
 FIDRES 0.126314 Hz  
 AQ 3.9584243 sec  
 RG 406.4  
 OW 120.800 usec  
 DE 6.00 usec  
 TE 300.0 K  
 D1 1.00000000 sec

\*\*\*\*\* CHANNEL f1 \*\*\*\*\*  
 NUC1 1H  
 P1 9.00 usec  
 PL1 -4.00 dB  
 SFO1 200.1312359 MHz

F2 - Processing parameters  
 SI 16384  
 SF 200.1300109 MHz  
 MDW EM  
 SSB 0  
 LB 0.30 Hz  
 GB 0  
 PC 1.00

1D NMR plot parameters  
 CX 20.00 cm  
 F1P 11.000 ppm  
 F1 2201.43 Hz  
 F2P -1.000 ppm  
 F2 -200.13 Hz  
 PPMCM 0.60000 ppm/cm  
 HZCM 120.07800 Hz/cm

Fig. 21: <sup>1</sup>H NMR Spectrum of Alcohol 16a

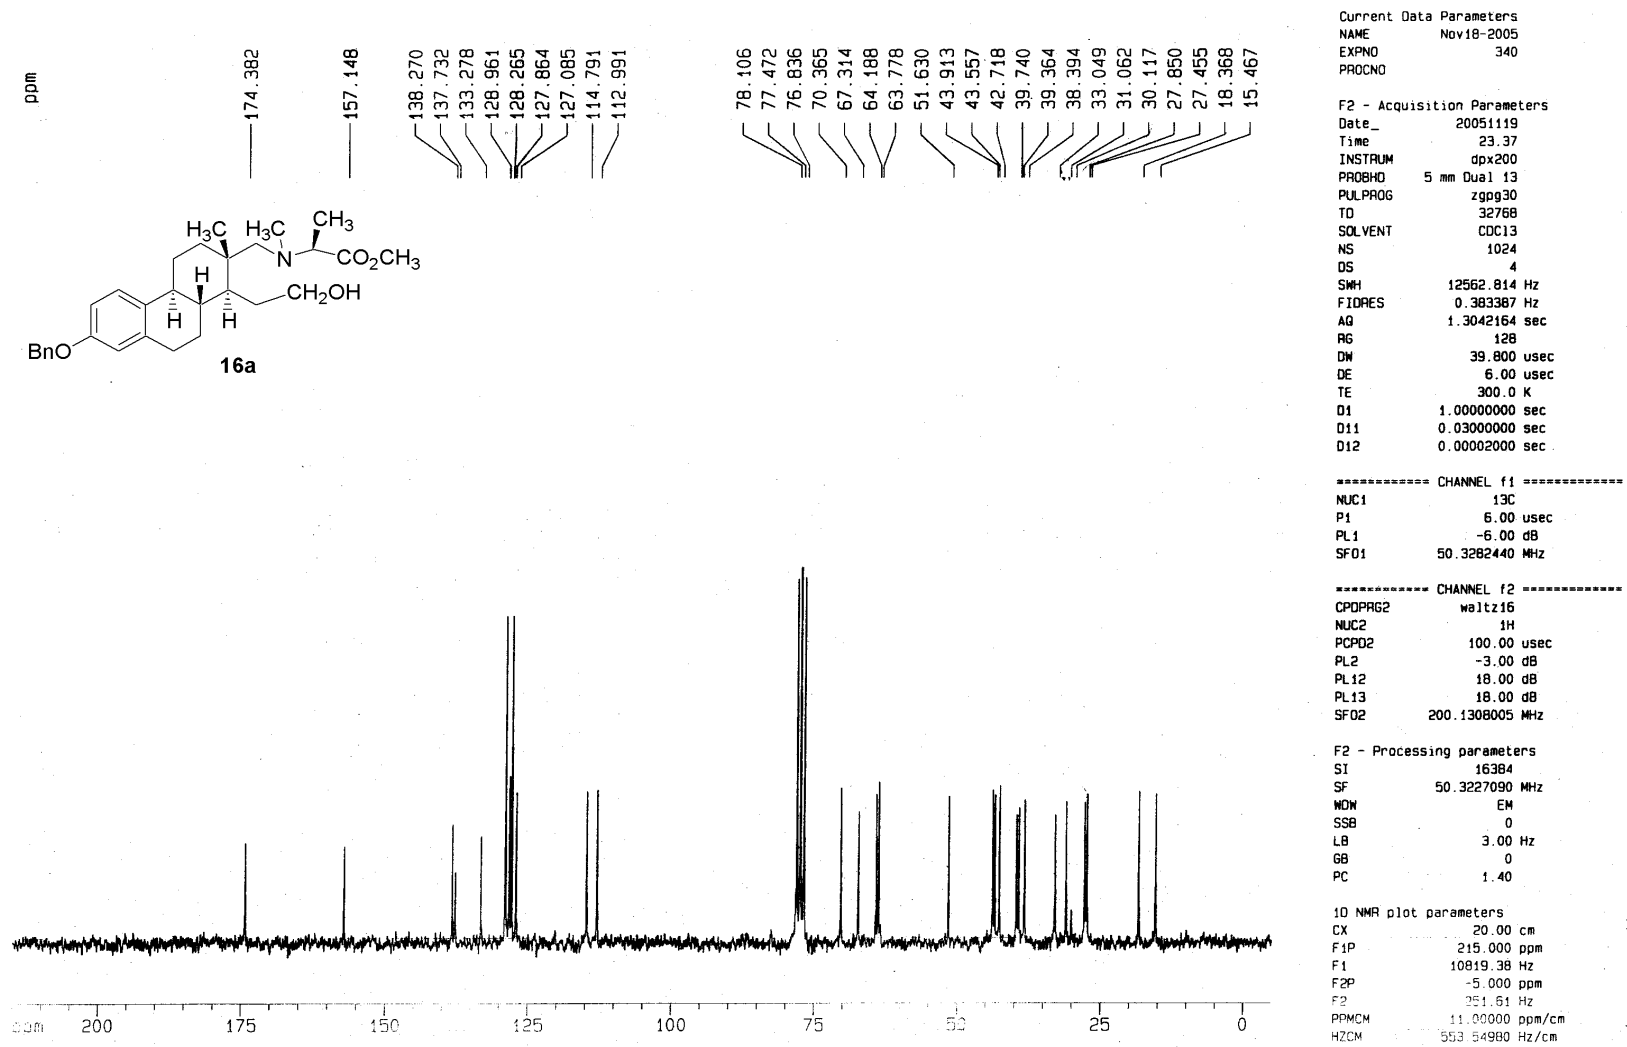

**Fig. 22:**  $^{13}\text{C}$  NMR Spectrum of Alcohol 16a

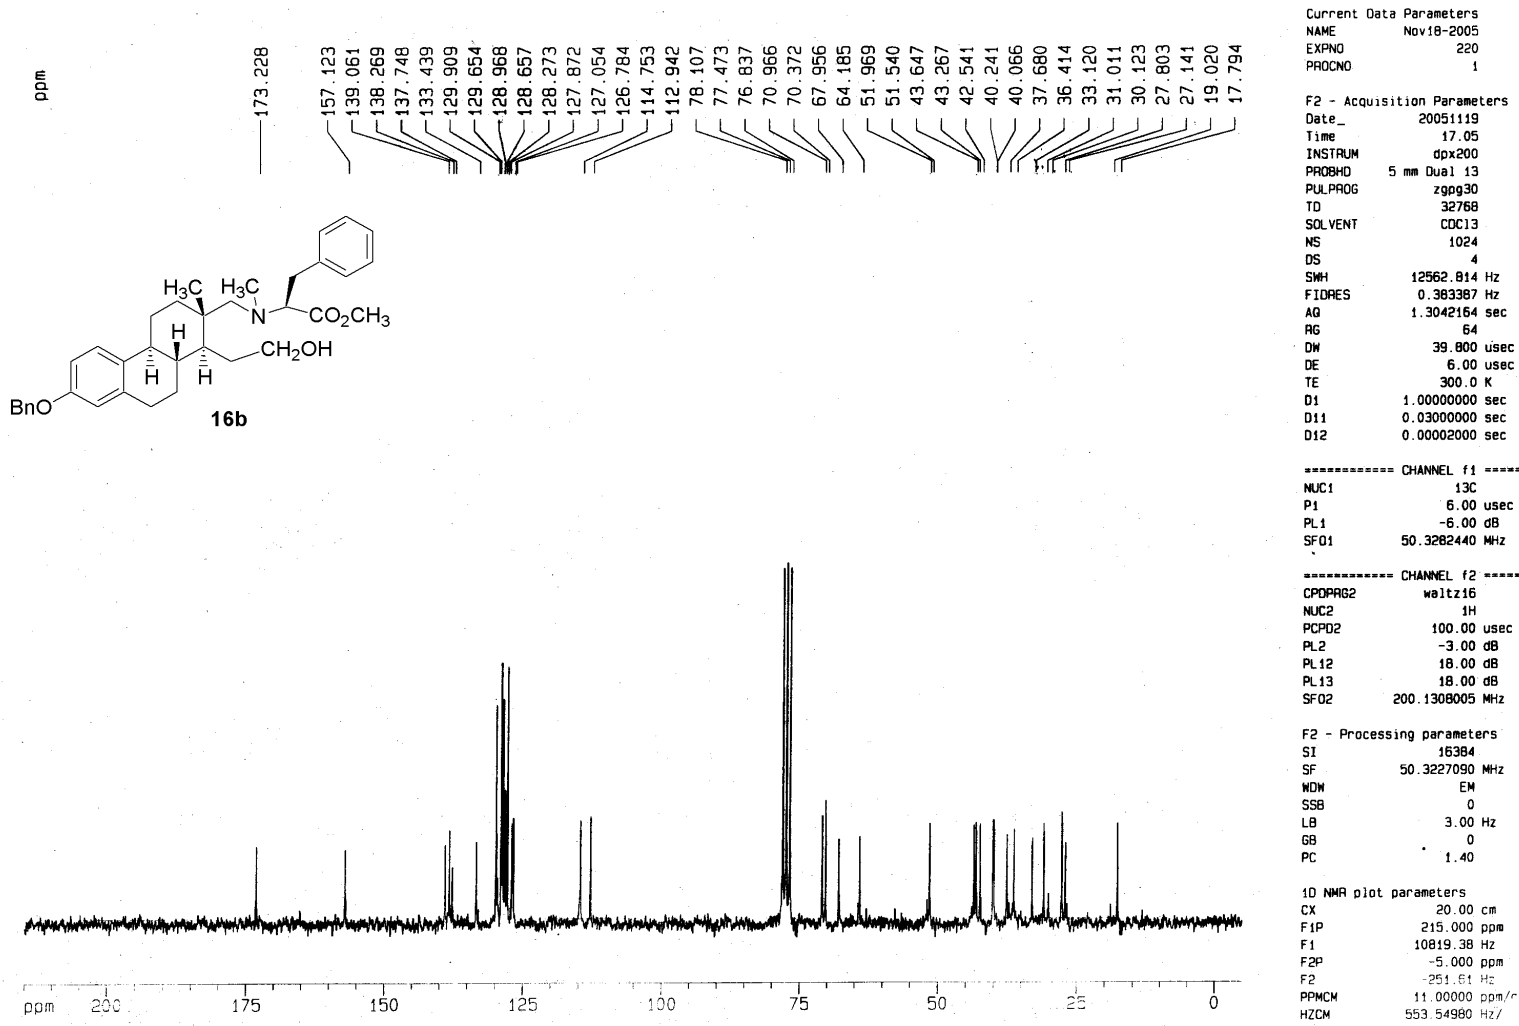

**Fig. 23:**  $^{13}\text{C}$  NMR Spectrum of Alcohol **16b**



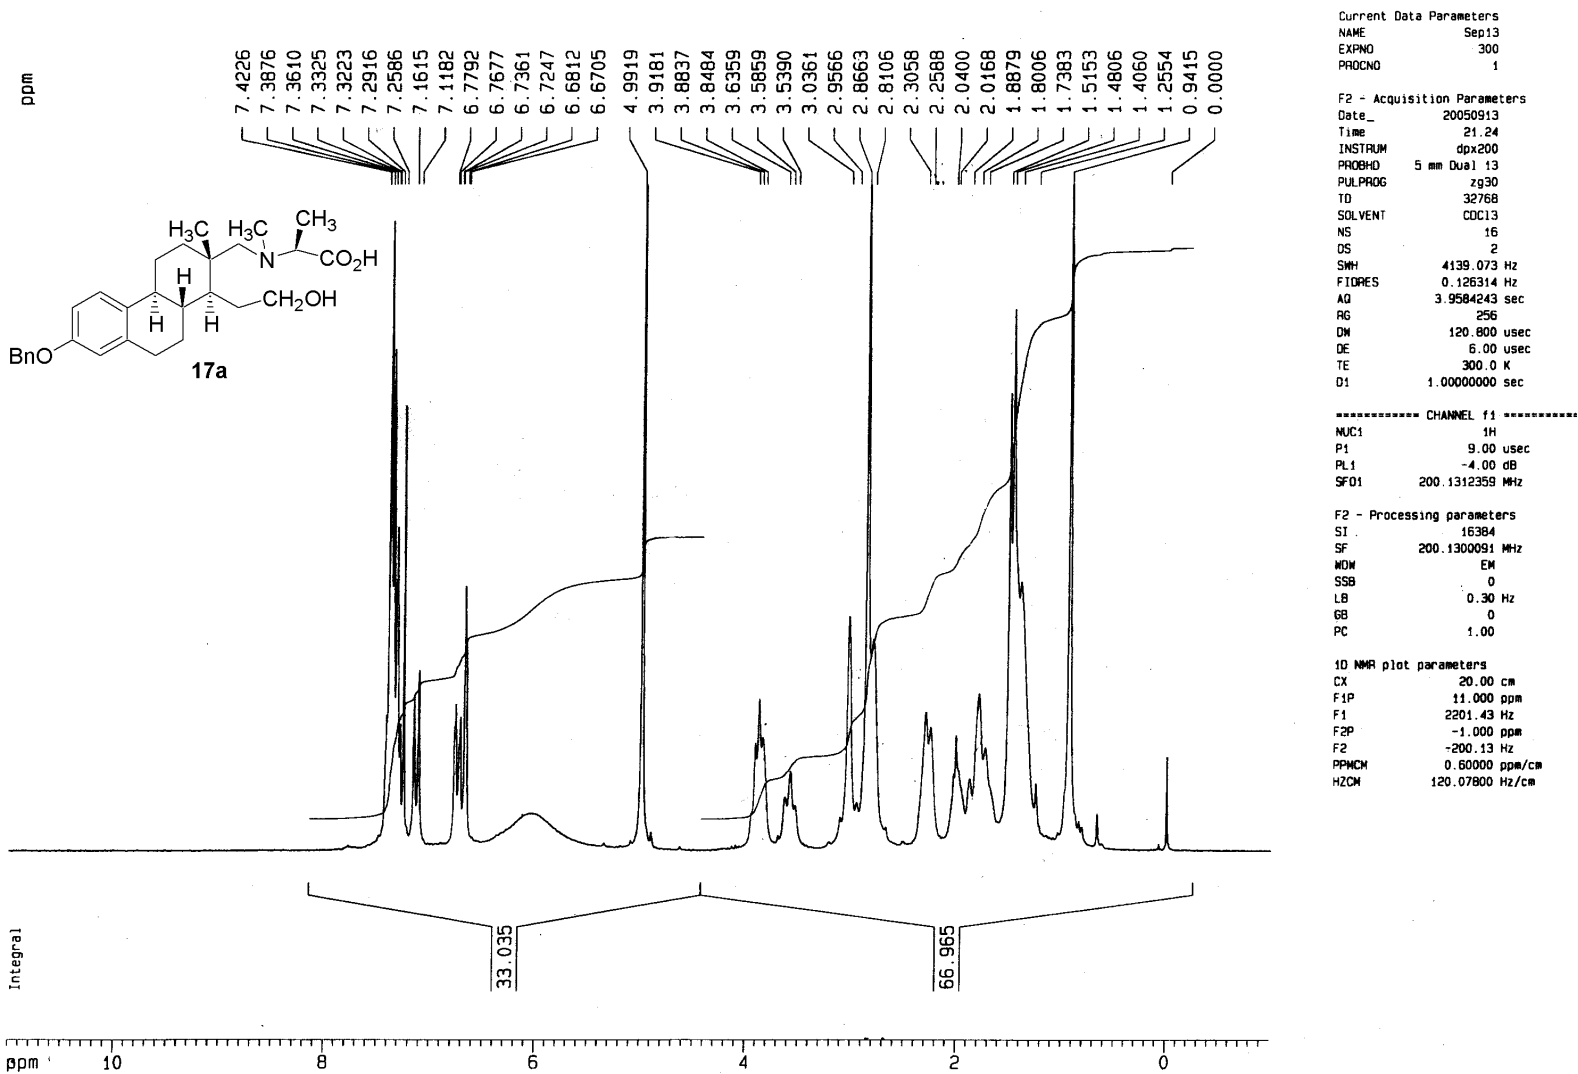

Fig. 24:  $^1\text{H}$  NMR Spectrum of Hydroxy Acid 17a

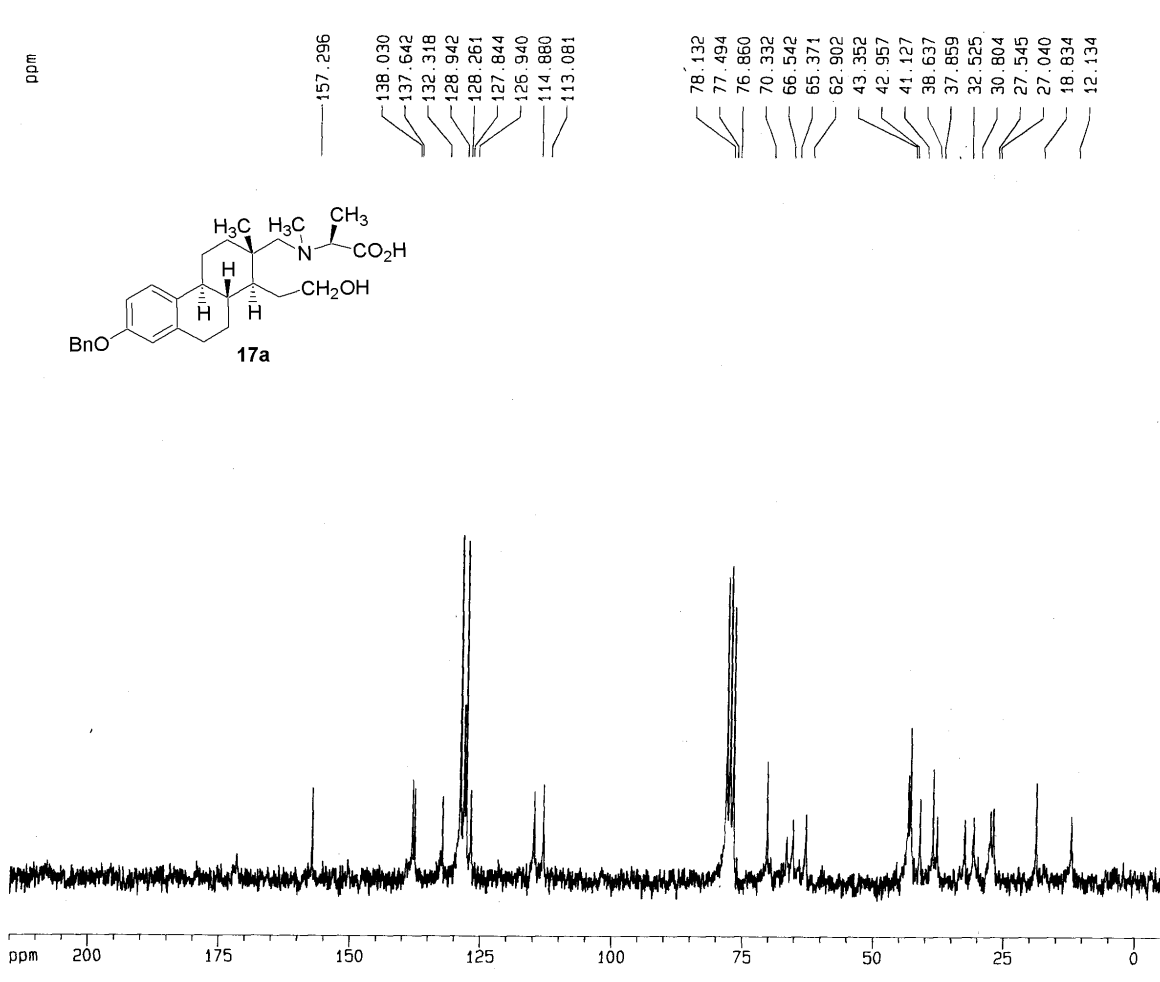

Current Data Parameters  
 NAME Sep16-2005  
 EXPNO 190  
 PROCNO 1

F2 - Acquisition Parameters  
 Date\_ 20050917  
 Time 15 15  
 INSTRUM dpx200  
 PROBHD 5 mm Dual 13  
 PULPROG zgpg30  
 TD 32768  
 SOLVENT CDCl3  
 NS 1024  
 DS 4  
 SWH 12562.814 Hz  
 FIDRES 0.383387 Hz  
 AQ 1.3042154 sec  
 RG 143.7  
 DM 39.800 usec  
 DE 6.00 usec  
 TE 300.0 K  
 D1 1.00000000 sec  
 D11 0.03000000 sec  
 D12 0.00002000 sec

===== CHANNEL f1 =====  
 NUC1 13C  
 P1 6.00 usec  
 PL1 -6.00 dB  
 SFO1 50.3282440 MHz

===== CHANNEL f2 =====  
 CPDPRG2 waltz16  
 NUC2 1H  
 PCPD2 100.00 usec  
 PL2 -3.00 dB  
 PL12 18.00 dB  
 PL13 18.00 dB  
 SFO2 200.1308005 MHz

F2 - Processing parameters  
 SI 16384  
 SF 50.3227090 MHz  
 WDW EM  
 SSB 0  
 LB 3.00 Hz  
 GB 0  
 PC 1.40

1D NMR plot parameters  
 CX 20.00 cm  
 F1P 215.000 ppm  
 F1 10819.38 Hz  
 F2P -5.000 ppm  
 F2 -251.61 Hz  
 PPMCM 11.00000 ppm/cm  
 HZCM 553.54960 Hz/cm

Fig. 25: <sup>13</sup>C NMR Spectrum of Hydroxy Acid 17a

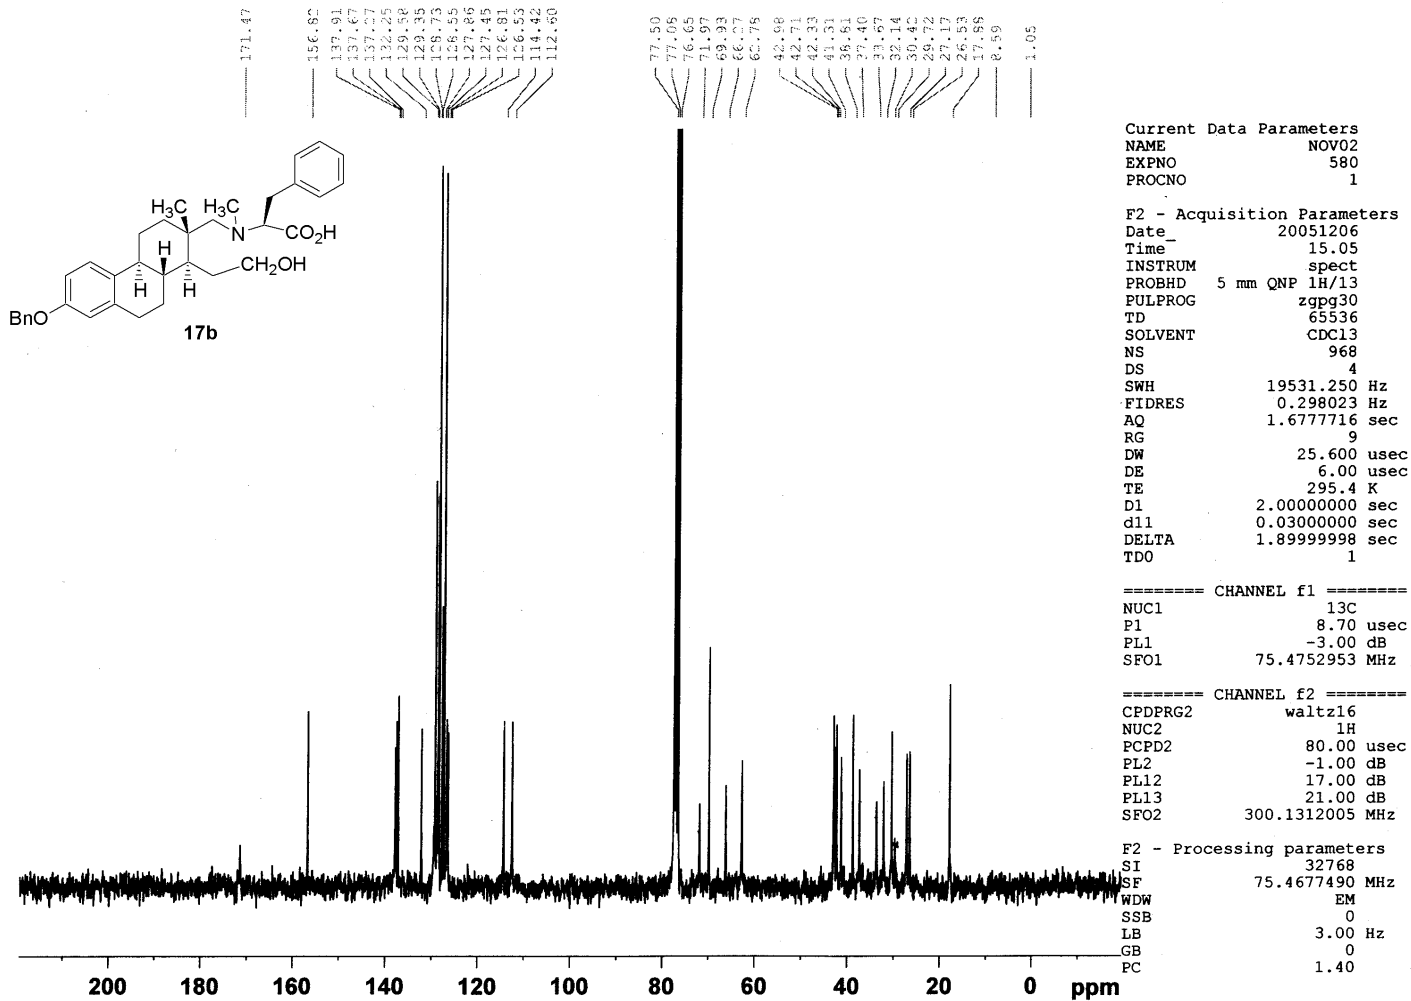

Fig. 26:  $^{13}\text{C}$  NMR Spectrum of Hydroxy Acid 17b

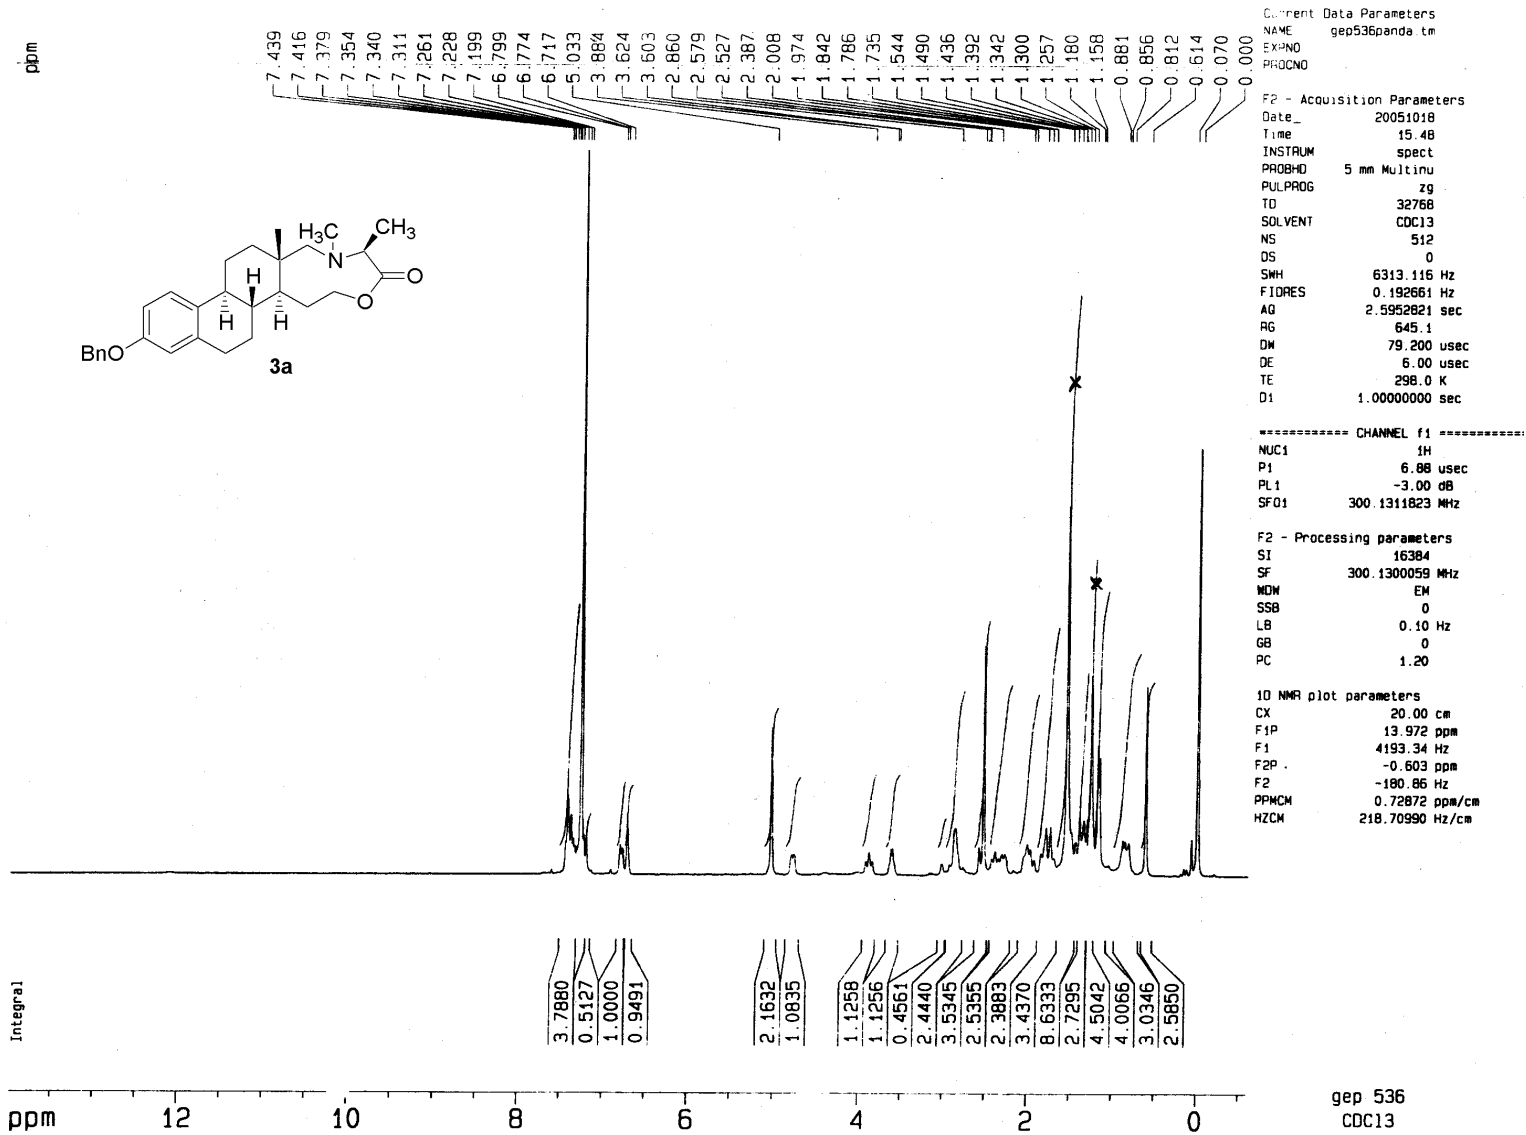

Fig. 27: <sup>1</sup>H NMR Spectrum of Lactone 3a

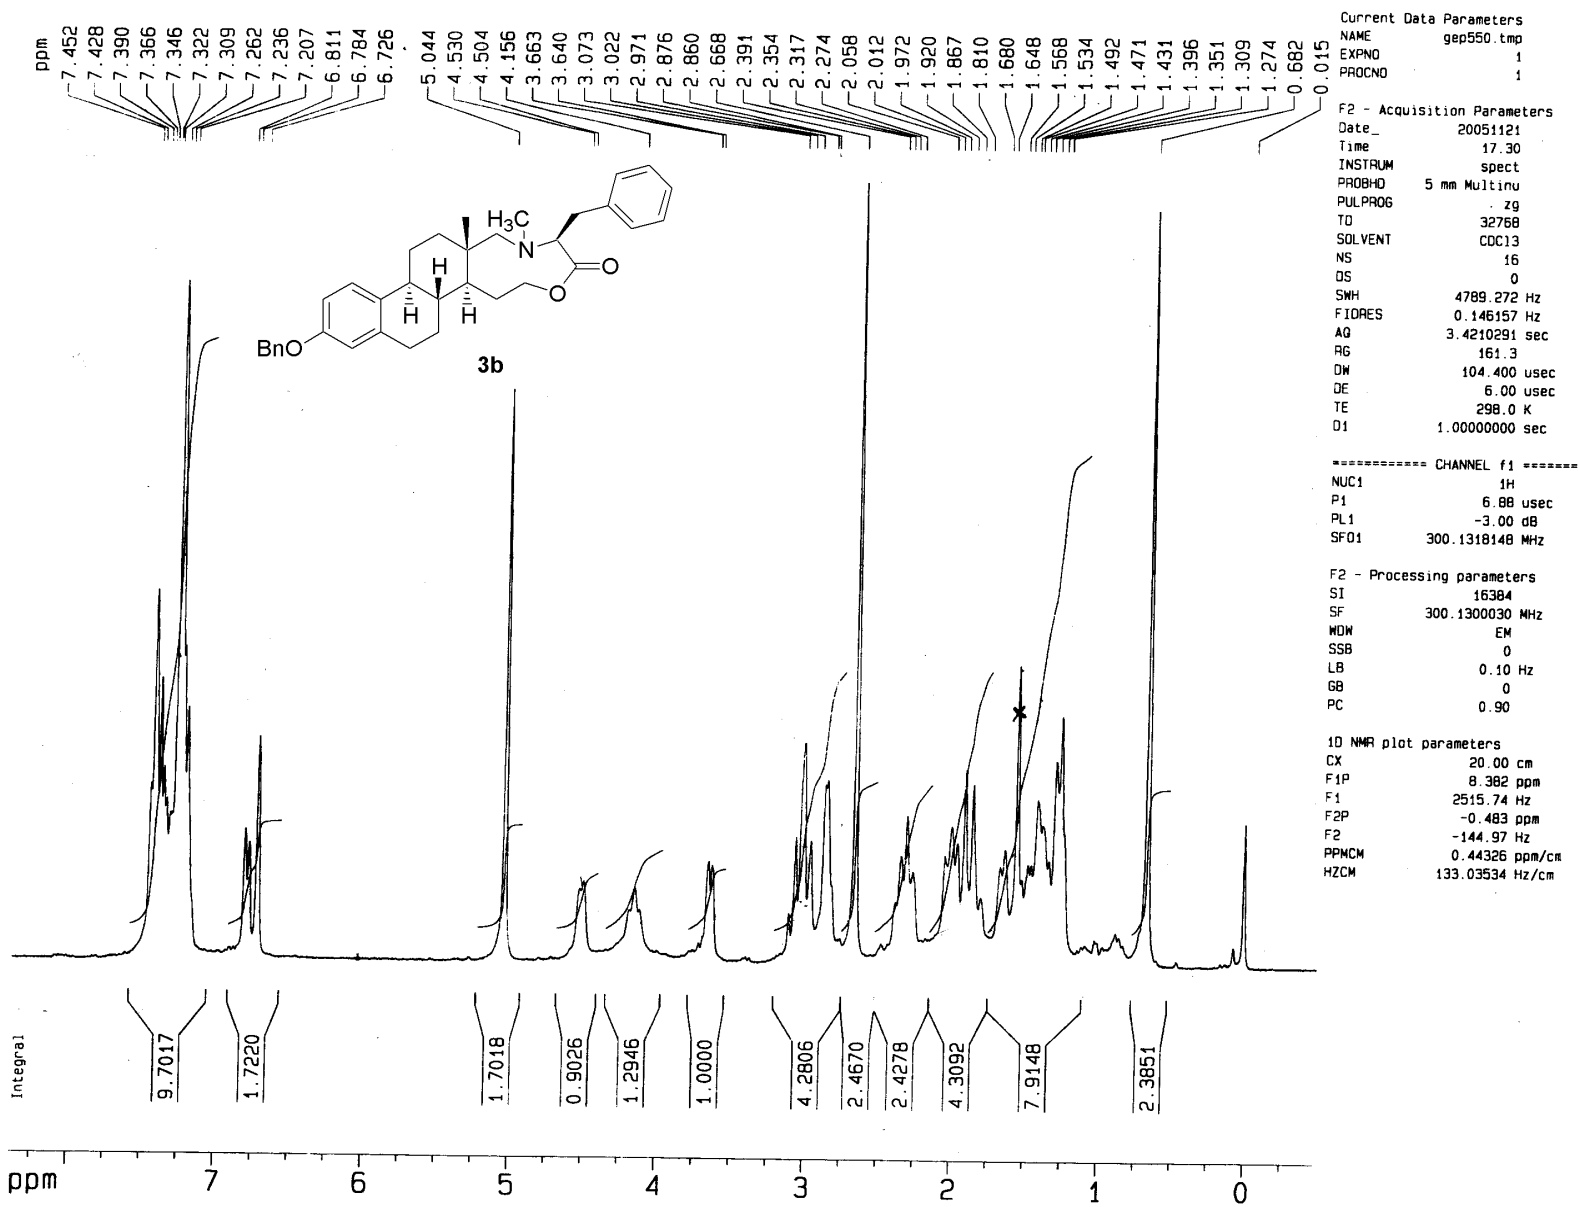

Fig. 28:  $^1\text{H}$  NMR Spectrum of Lactone **3b**

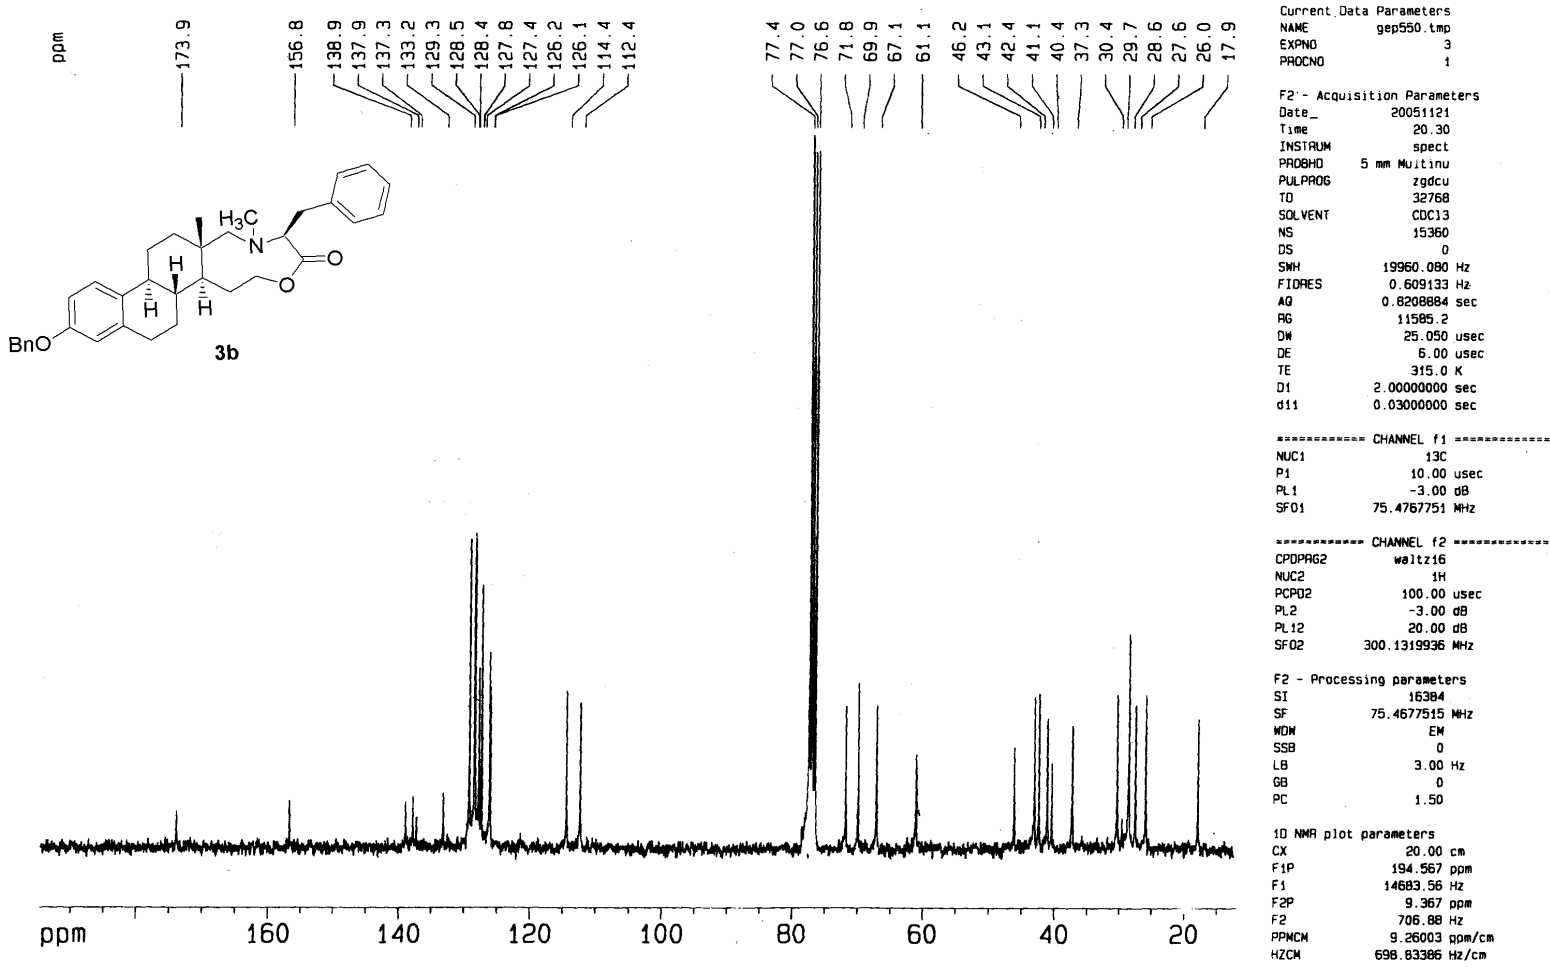

Fig. 29: <sup>13</sup>C NMR Spectrum of Lactone 3b

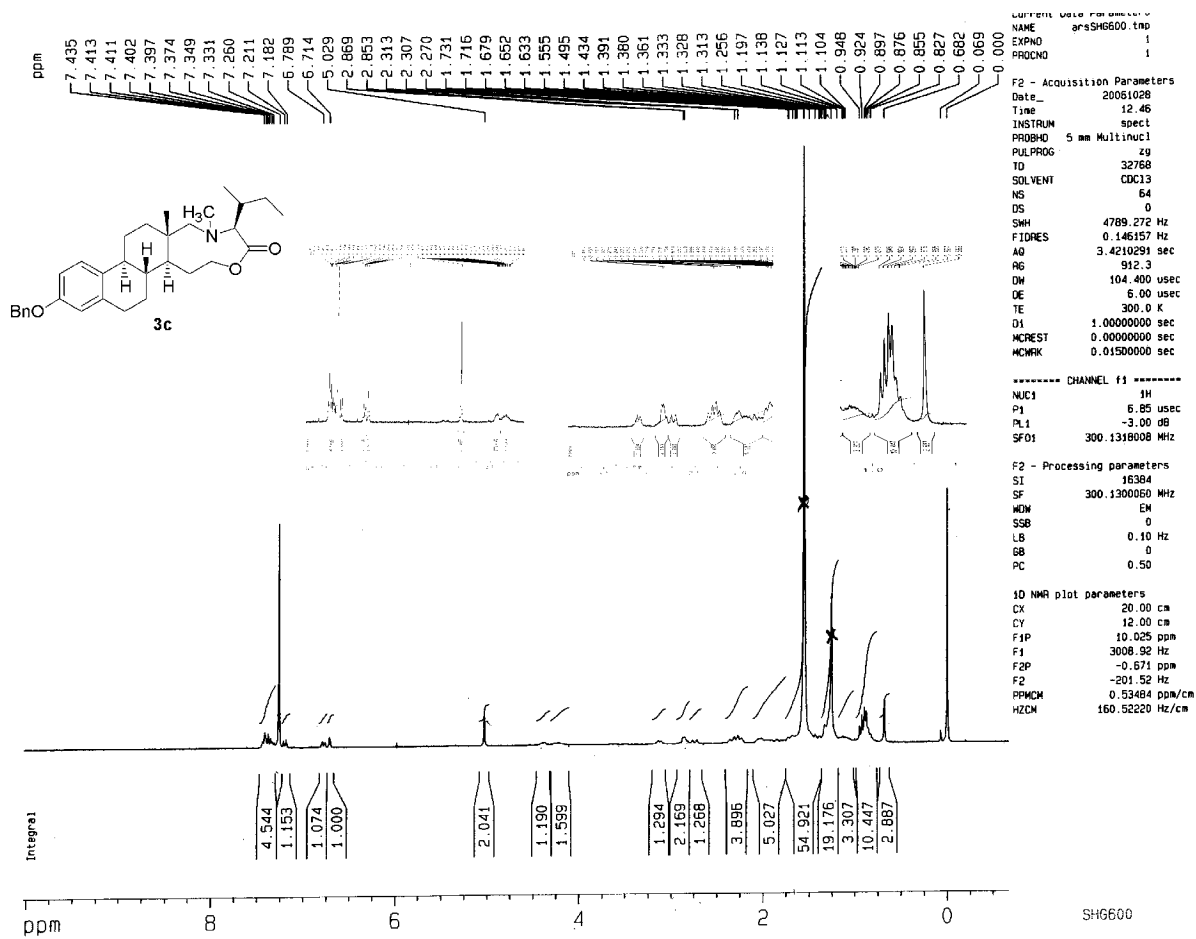

**Fig. 33:**  $^1\text{H}$  NMR Spectrum of Lactone **3c**

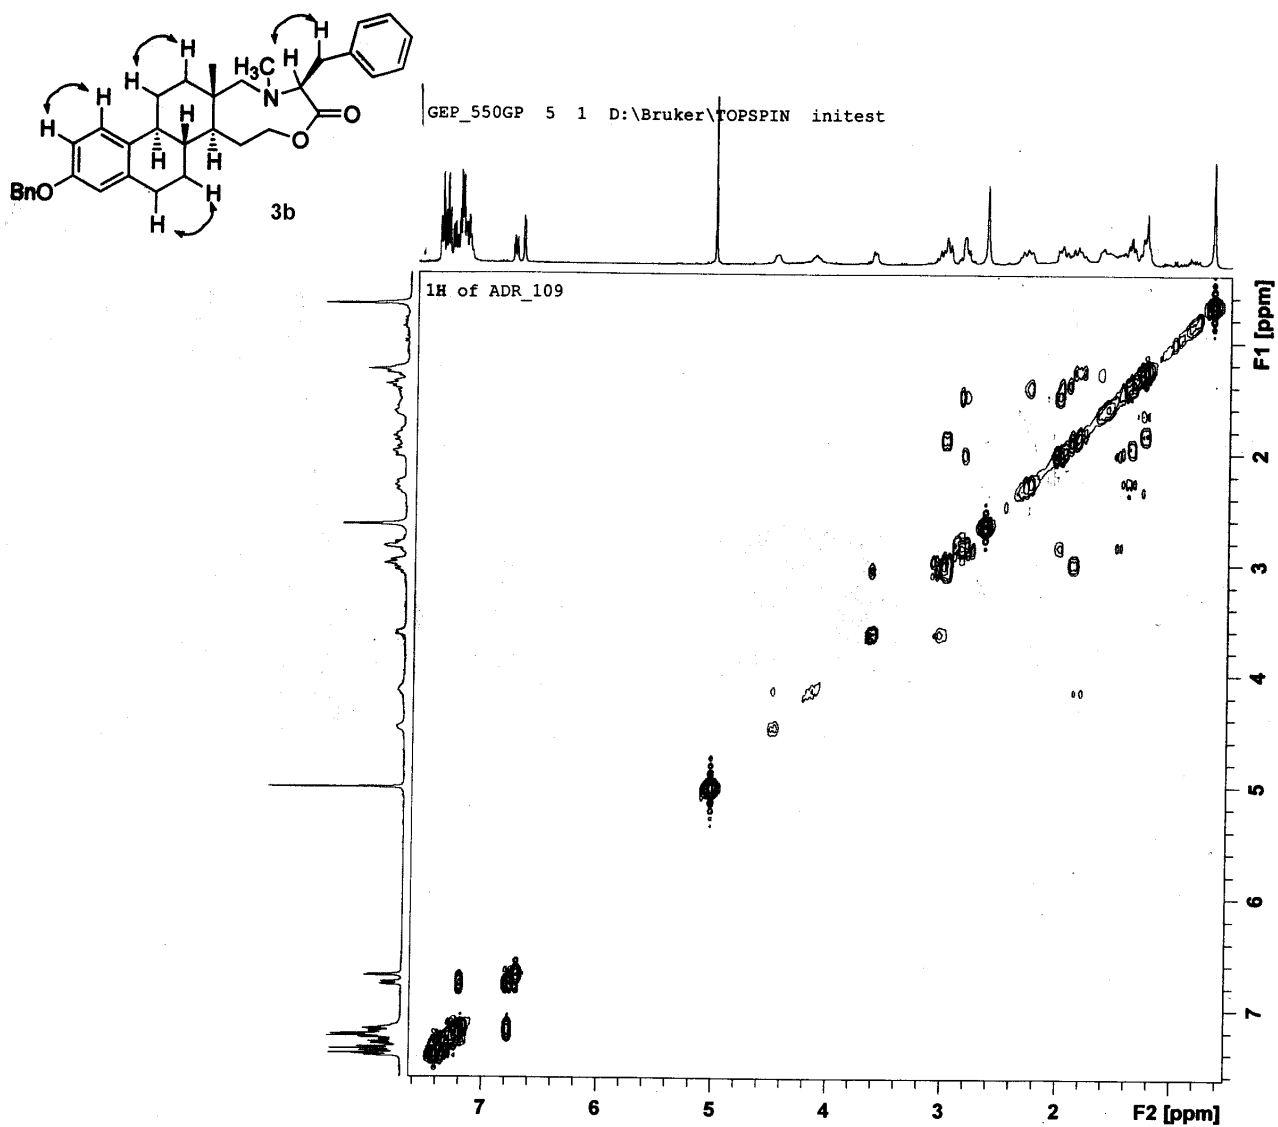

Fig. 30:  $^1\text{H}$ - $^1\text{H}$  COSY Spectrum of Lactone **3b**





GEP\_550GP 3 1 D:\Bruker\TOPSPIN initest

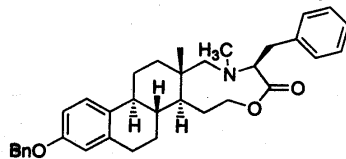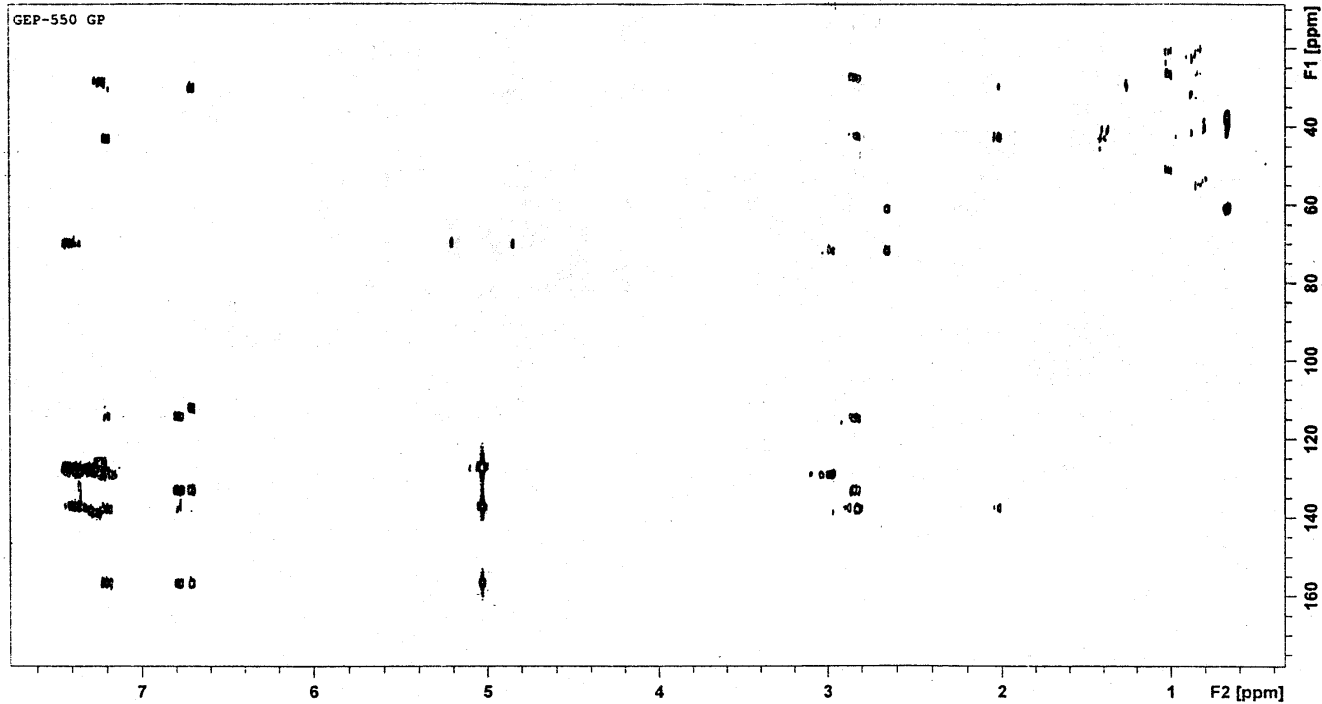

Fig. 32: 2-D HMBC Spectrum of Lactone **3b**
